# Supplementary material
Source: PubMed Central journal article supplement (PMC4847641)
Supplement: NIHMS67657-supplement-Supplementary_Material.pdf [file NIHMS67657-supplement-Supplementary_Material.pdf]

## Web-based Supplementary Materials for ‘Handling Missing Data in Matched Case-Control Studies using Multiple Imputation’ by SR Seaman and RH Keogh

### Web Appendix A: Proof that equation (1) implies (2) and vice versa

First, suppose that equation (1) holds for any function  $q(\mathbf{S})$ . Then

$$\begin{aligned} & G(\mathbf{x}_1^{\text{cat}}, \mathbf{x}_1^{\text{con}}, \dots, \mathbf{x}_{M+1}^{\text{cat}}, \mathbf{x}_{M+1}^{\text{con}}) \\ &= \frac{P(D = 1 \mid \mathbf{X}^{\text{cat}} = \mathbf{x}_1^{\text{cat}}, \mathbf{X}^{\text{con}} = \mathbf{x}_1^{\text{con}}, \mathbf{S}) \prod_{k=2}^{M+1} P(D = 0 \mid \mathbf{X}^{\text{cat}} = \mathbf{x}_k^{\text{cat}}, \mathbf{X}^{\text{con}} = \mathbf{x}_k^{\text{con}}, \mathbf{S})}{\sum_{j=1}^{M+1} P(D = 1 \mid \mathbf{X}^{\text{cat}} = \mathbf{x}_j^{\text{cat}}, \mathbf{X}^{\text{con}} = \mathbf{x}_j^{\text{con}}, \mathbf{S}) \prod_{k \neq j} P(D = 0 \mid \mathbf{X}^{\text{cat}} = \mathbf{x}_k^{\text{cat}}, \mathbf{X}^{\text{con}} = \mathbf{x}_k^{\text{con}}, \mathbf{S})} \\ &= \frac{\exp(\boldsymbol{\beta}_{\text{cat}}^\top \mathbf{x}_1^{\text{cat}} + \boldsymbol{\beta}_{\text{con}}^\top \mathbf{x}_1^{\text{con}})}{\sum_{j=1}^{M+1} \exp(\boldsymbol{\beta}_{\text{cat}}^\top \mathbf{x}_j^{\text{cat}} + \boldsymbol{\beta}_{\text{con}}^\top \mathbf{x}_j^{\text{con}})} \end{aligned}$$

Second, suppose that equation (2) holds. Then

$$G(\mathbf{x}^{\text{cat}}, \mathbf{x}^{\text{con}}, \mathbf{0}, \mathbf{0}, \dots, \mathbf{0}, \mathbf{0}) = \frac{\exp(\boldsymbol{\beta}_{\text{cat}}^\top \mathbf{x}^{\text{cat}} + \boldsymbol{\beta}_{\text{con}}^\top \mathbf{x}^{\text{con}})}{\exp(\boldsymbol{\beta}_{\text{cat}}^\top \mathbf{x}^{\text{cat}} + \boldsymbol{\beta}_{\text{con}}^\top \mathbf{x}^{\text{con}}) + M}.$$

Therefore

$$\begin{aligned} & \frac{\exp(\boldsymbol{\beta}_{\text{cat}}^\top \mathbf{x}^{\text{cat}} + \boldsymbol{\beta}_{\text{con}}^\top \mathbf{x}^{\text{con}})}{\exp(\boldsymbol{\beta}_{\text{cat}}^\top \mathbf{x}^{\text{cat}} + \boldsymbol{\beta}_{\text{con}}^\top \mathbf{x}^{\text{con}}) + M} \\ &= \frac{P(D = 1 \mid \mathbf{X}^{\text{cat}} = \mathbf{x}^{\text{cat}}, \mathbf{X}^{\text{con}} = \mathbf{x}^{\text{con}}, \mathbf{S}) P(D = 0 \mid \mathbf{X}^{\text{cat}} = \mathbf{0}, \mathbf{X}^{\text{con}} = \mathbf{0}, \mathbf{S})^M}{\left\{ \begin{array}{l} P(D = 1 \mid \mathbf{X}^{\text{cat}} = \mathbf{x}^{\text{cat}}, \mathbf{X}^{\text{con}} = \mathbf{x}^{\text{con}}, \mathbf{S}) P(D = 0 \mid \mathbf{X}^{\text{cat}} = \mathbf{0}, \mathbf{X}^{\text{con}} = \mathbf{0}, \mathbf{S})^M \\ + M P(D = 1 \mid \mathbf{X}^{\text{cat}} = \mathbf{0}, \mathbf{X}^{\text{con}} = \mathbf{0}, \mathbf{S}) P(D = 0 \mid \mathbf{X}^{\text{cat}} = \mathbf{x}^{\text{cat}}, \mathbf{X}^{\text{con}} = \mathbf{x}^{\text{con}}, \mathbf{S}) \\ \times P(D = 0 \mid \mathbf{X}^{\text{cat}} = \mathbf{0}, \mathbf{X}^{\text{con}} = \mathbf{0}, \mathbf{S})^{M-1} \end{array} \right\}}. \end{aligned}$$

This implies that

$$\begin{aligned} & M \exp(-\boldsymbol{\beta}_{\text{cat}}^\top \mathbf{x}^{\text{cat}} - \boldsymbol{\beta}_{\text{con}}^\top \mathbf{x}^{\text{con}}) + 1 \\ &= 1 + M \frac{P(D = 1 \mid \mathbf{X}^{\text{cat}} = \mathbf{0}, \mathbf{X}^{\text{con}} = \mathbf{0}, \mathbf{S}) P(D = 0 \mid \mathbf{X}^{\text{cat}} = \mathbf{x}^{\text{cat}}, \mathbf{X}^{\text{con}} = \mathbf{x}^{\text{con}}, \mathbf{S})}{P(D = 1 \mid \mathbf{X}^{\text{cat}} = \mathbf{x}^{\text{cat}}, \mathbf{X}^{\text{con}} = \mathbf{x}^{\text{con}}, \mathbf{S}) P(D = 0 \mid \mathbf{X}^{\text{cat}} = \mathbf{0}, \mathbf{X}^{\text{con}} = \mathbf{0}, \mathbf{S})} \end{aligned}$$

which, in turn, implies that

$$\begin{aligned} & \exp(\boldsymbol{\beta}_{\text{cat}}^\top \mathbf{x}^{\text{cat}} + \boldsymbol{\beta}_{\text{con}}^\top \mathbf{x}^{\text{con}}) \\ &= \frac{P(D = 1 \mid \mathbf{X}^{\text{cat}} = \mathbf{x}^{\text{cat}}, \mathbf{X}^{\text{con}} = \mathbf{x}^{\text{con}}, \mathbf{S})}{P(D = 0 \mid \mathbf{X}^{\text{cat}} = \mathbf{x}^{\text{cat}}, \mathbf{X}^{\text{con}} = \mathbf{x}^{\text{con}}, \mathbf{S})} \times \frac{P(D = 0 \mid \mathbf{X}^{\text{cat}} = \mathbf{0}, \mathbf{X}^{\text{con}} = \mathbf{0}, \mathbf{S})}{P(D = 1 \mid \mathbf{X}^{\text{cat}} = \mathbf{0}, \mathbf{X}^{\text{con}} = \mathbf{0}, \mathbf{S})}. \end{aligned}$$

Since this is true for any  $\mathbf{x}^{\text{cat}}$ ,  $\mathbf{x}^{\text{con}}$  and any value of  $\mathbf{S}$ , equation (1) holds with  $q(\mathbf{S}) = \text{logit } P(D = 1 \mid \mathbf{X}^{\text{cat}} = \mathbf{0}, \mathbf{X}^{\text{con}} = \mathbf{0}, \mathbf{S})$ .

## Web Appendix B: Joint Model MI and Full-Conditional Specification (FCS) MI

In this appendix, we provide a more technical description of joint model MI and FCS MI than that given in the main text of the paper. We begin with joint model MI, and then discuss FCS MI and its relation to joint model MI.

Consider a generic dataset with  $n$  units and  $K$  random variables  $Y_1, \dots, Y_K$  potentially measured on each unit. Let  $\mathbf{Y}_{-k} = (Y_1, \dots, Y_{k-1}, Y_{k+1}, \dots, Y_K)$ . Use subscript  $i$  to index the unit. So,  $Y_{ik}$  ( $i = 1, \dots, n$ ) and  $\mathbf{Y}_{i,-k}$  denote, respectively,  $Y_k$  and  $\mathbf{Y}_{-k}$  for the  $i$ th unit. Let  $\mathbf{Y}_{\bullet k} = (Y_{1k}, \dots, Y_{nk})$  and  $\mathbf{Y}_{\bullet -k} = (\mathbf{Y}_{\bullet 1}, \dots, \mathbf{Y}_{\bullet k-1}, \mathbf{Y}_{\bullet k+1}, \dots, \mathbf{Y}_{\bullet K})$ . Let  $\mathbf{Y}_{\bullet k}^{\text{obs}}$  and  $\mathbf{Y}_{\bullet k}^{\text{mis}}$  denote, respectively, the observed and missing parts of  $\mathbf{Y}_{\bullet k}$ , and let  $\mathbf{Y}_{\bullet -k}^{\text{obs}}$  and  $\mathbf{Y}_{\bullet -k}^{\text{mis}}$  denote the observed and missing parts of  $\mathbf{Y}_{\bullet -k}$ .

In joint model MI, a model  $f(Y_1, \dots, Y_K \mid \boldsymbol{\theta})$  is specified for  $Y_1, \dots, Y_K$ , with prior distribution  $\pi(\boldsymbol{\theta})$  on the parameters  $\boldsymbol{\theta}$  of this model. Random vectors  $(Y_{i1}, \dots, Y_{iK})$  and  $(Y_{j1}, \dots, Y_{jK})$  ( $i \neq j$ ) are assumed to be conditionally independent given  $\boldsymbol{\theta}$ . Let  $f_k(Y_k \mid \mathbf{Y}_{-k}; \boldsymbol{\theta})$  denote the full-conditional distribution of  $Y_k$ , i.e. the distribution of  $Y_k$  given  $\mathbf{Y}_{-k}$  and  $\boldsymbol{\theta}$  implied by  $f(Y_1, \dots, Y_K \mid \boldsymbol{\theta})$ . Imputed values for  $\mathbf{Y}_{\bullet 1}^{\text{mis}}, \dots, \mathbf{Y}_{\bullet K}^{\text{mis}}$  are drawn from their posterior predictive distribution:

$$p(\mathbf{Y}_{\bullet 1}^{\text{mis}}, \dots, \mathbf{Y}_{\bullet K}^{\text{mis}} \mid \mathbf{Y}_{\bullet 1}^{\text{obs}}, \dots, \mathbf{Y}_{\bullet K}^{\text{obs}}) \propto \int f(\mathbf{Y}_{\bullet 1}^{\text{mis}}, \dots, \mathbf{Y}_{\bullet K}^{\text{mis}} \mid \mathbf{Y}_{\bullet 1}^{\text{obs}}, \dots, \mathbf{Y}_{\bullet K}^{\text{obs}}, \boldsymbol{\theta}) \pi(\boldsymbol{\theta}) \\ \times f(\mathbf{Y}_{\bullet 1}^{\text{obs}}, \dots, \mathbf{Y}_{\bullet K}^{\text{obs}} \mid \boldsymbol{\theta}) d\boldsymbol{\theta}$$

(Little and Rubin, 2002). This can be achieved by using a Gibbs sampler algorithm. One form of the Gibbs sampler is as follows (Liu et al., 2014). Initially, the missing values of  $Y_k$  ( $k = 1, \dots, K$ ) are replaced by the mean, or a random sample, of the observed values of  $Y_k$ .

A single iteration of the Gibbs sampler involves  $K$  steps, in the  $k$ th of which the missing values of  $Y_k$  are updated. The  $k$ th step ( $k = 1, \dots, K$ ) of the algorithm is to sample  $\boldsymbol{\theta}$  from its posterior distribution given  $\mathbf{Y}_{\bullet k}^{\text{obs}}$  and  $\mathbf{Y}_{\bullet -k}$  (using the current value of  $\mathbf{Y}_{\bullet -k}^{\text{mis}}$ ) and then, for each individual  $i$  ( $i = 1, \dots, n$ ) with missing  $Y_{ik}$ , to sample  $Y_{ik}$  from  $f_k(Y_{ik} \mid \mathbf{Y}_{i, -k}; \boldsymbol{\theta})$  using the sampled value of  $\boldsymbol{\theta}$ . Step  $k$  is omitted if  $Y_k$  is fully observed. The Gibbs sampler is iterated until convergence, at which point  $\mathbf{Y}_{\bullet 1}^{\text{mis}}, \dots, \mathbf{Y}_{\bullet K}^{\text{mis}}$  are drawn from their posterior predictive distribution. This algorithm is applied repeatedly to the original dataset, in order to create multiple imputed datasets. The analysis model is then fitted to each imputed dataset separately and the resulting parameter and variance estimates combined using Rubin's Rules (Little and Rubin, 2002). The imputation model is said to be *compatible with the analysis model* if there exists a model for the joint distribution of all the variables that implies the analysis and imputation models as submodels. When the imputation model is correctly specified and compatible with the analysis model, and data are MAR, joint model MI gives consistent parameter and variance estimates for the analysis model (Little and Rubin, 2002).

An alternative to joint model MI is FCS MI (also known as MI by chained equations) (van Buuren, 2012). FCS MI avoids the need to specify a model for the joint distribution of  $Y_1, \dots, Y_K$  and to sample from the corresponding posterior of  $\boldsymbol{\theta}$  given  $\mathbf{Y}_{\bullet k}^{\text{obs}}$  and  $\mathbf{Y}_{\bullet -k}$  and from the full-conditionals. Instead, for each  $k = 1, \dots, K$ , a model  $g_k(Y_k \mid \mathbf{Y}_{-k}; \boldsymbol{\theta}_k)$  is specified for the conditional distribution of  $Y_k$  given  $\mathbf{Y}_{-k}$ , and a non-informative prior  $\pi_k(\boldsymbol{\theta}_k)$  is specified for the parameters  $\boldsymbol{\theta}_k$  of this model. FCS proceeds as per the Gibbs sampler except that at step  $k$ ,  $\boldsymbol{\theta}_k$  is sampled from the posterior distribution proportional to the likelihood formed by the product of  $g_k(Y_{ik} \mid \mathbf{Y}_{i, -k}; \boldsymbol{\theta}_k)$  over units with observed  $Y_{ik}$  multiplied by the prior  $\pi_k(\boldsymbol{\theta}_k)$ , and missing values of  $Y_{ik}$  are sampled from  $g_k(Y_{ik} \mid \mathbf{Y}_{i, -k}; \boldsymbol{\theta}_k)$ . Step  $k$  and the specification of  $g_k(Y_k \mid \mathbf{Y}_{-k}; \boldsymbol{\theta}_k)$  is omitted if  $Y_k$  is fully observed.

An important theoretical result about the asymptotic relation between joint model MI and

FCS MI was provided by Liu et al. (2014). They defined the set of conditional models  $\{g_k(Y_k | \mathbf{Y}_{-k}; \boldsymbol{\theta}_k) : k = 1, \dots, K\}$  to be ‘compatible’ with a joint model  $f(Y_1, \dots, Y_K; \boldsymbol{\theta})$  if the following condition holds for each  $k = 1, \dots, K$ . For each value of  $\boldsymbol{\theta}_k$  in its parameter space, there exists at least one value of  $\boldsymbol{\theta}$  in its parameter space for which  $g_k(Y_k | \mathbf{Y}_{-k}; \boldsymbol{\theta}_k) = f_k(Y_k | \mathbf{Y}_{-k}; \boldsymbol{\theta})$ . (Note that there is no need for there to exist a value of  $\boldsymbol{\theta}$  for which this is true for all  $k = 1, \dots, K$  simultaneously.) Liu et al. (2014) showed that when the set of conditional models is compatible with a joint model, the distribution of the imputed data converges, as the sample size tends to infinity, to the posterior predictive distribution of the missing data under that joint model. Hence, the use of FCS MI is asymptotically valid in this case.

For more information about joint model MI and FCS MI, refer to, for example, Carpenter and Kenward (2013).

### Web Appendix C: Proof that equations (3) and (4) imply that (2) holds with

$$\boldsymbol{\beta}_{\text{con}} = \boldsymbol{\Sigma}^{-1}\boldsymbol{\phi} \text{ and } \boldsymbol{\beta}_{\text{cat}} = \boldsymbol{\lambda} - \boldsymbol{\gamma}^\top \boldsymbol{\Sigma}^{-1}\boldsymbol{\phi}$$

$$\log p(\mathbf{X}^{\text{con}}, \mathbf{X}^{\text{cat}} | \mathbf{S}, D) = \log p(\mathbf{X}^{\text{con}} | \mathbf{X}^{\text{cat}}, \mathbf{S}, D) + \log p(\mathbf{X}^{\text{cat}} | \mathbf{S}, D) \quad (11)$$

From equation (4),

$$\begin{aligned} & \log p(\mathbf{X}^{\text{con}} | \mathbf{X}^{\text{cat}}, \mathbf{S}, D = 1) - \log p(\mathbf{X}^{\text{con}} | \mathbf{X}^{\text{cat}}, \mathbf{S}, D = 0) \\ &= \boldsymbol{\phi}^\top \boldsymbol{\Sigma}^{-1}(\mathbf{X}^{\text{con}} - \boldsymbol{\alpha} - \boldsymbol{\gamma}\mathbf{X}^{\text{cat}} - \boldsymbol{\delta}\mathbf{S}) - \boldsymbol{\phi}^\top \boldsymbol{\Sigma}^{-1}\boldsymbol{\phi}/2 \\ &= \boldsymbol{\phi}^\top \boldsymbol{\Sigma}^{-1}(\mathbf{X}^{\text{con}} - \boldsymbol{\gamma}\mathbf{X}^{\text{cat}}) - \boldsymbol{\phi}^\top \boldsymbol{\Sigma}^{-1}(\boldsymbol{\alpha} + \boldsymbol{\delta}\mathbf{S}) - \boldsymbol{\phi}^\top \boldsymbol{\Sigma}^{-1}\boldsymbol{\phi}/2 \end{aligned} \quad (12)$$

Note that only the first term in expression (12) depends on  $\mathbf{X}^{\text{cat}}$  or  $\mathbf{X}^{\text{con}}$ .

It follows from equation (3) that

$$\begin{aligned} & \log P(\mathbf{X}^{\text{cat}} = \mathbf{x}^{\text{cat}} | \mathbf{S}, D = 1) - \log P(\mathbf{X}^{\text{cat}} = \mathbf{x}^{\text{cat}} | \mathbf{S}, D = 0) \\ &= \boldsymbol{\lambda}^\top \mathbf{x}^{\text{cat}} + \text{terms that do not depend on } \mathbf{x}^{\text{cat}}. \end{aligned} \quad (13)$$

From equations (11), (12) and (13), we have,

$$\begin{aligned} & \log p(\mathbf{X}^{\text{con}}, \mathbf{X}^{\text{cat}} \mid \mathbf{S}, D = 1) - \log p(\mathbf{X}^{\text{con}}, \mathbf{X}^{\text{cat}} \mid \mathbf{S}, D = 0) \\ &= \boldsymbol{\phi}^\top \boldsymbol{\Sigma}^{-1}(\mathbf{X}^{\text{con}} - \gamma \mathbf{X}^{\text{cat}}) + \boldsymbol{\lambda}^\top \mathbf{X}^{\text{cat}} \\ & \quad + \text{terms that do not depend on } \mathbf{X}^{\text{cat}} \text{ or } \mathbf{X}^{\text{con}}. \end{aligned}$$

Therefore

$$\begin{aligned} & \log p(\mathbf{X}_1^{\text{con}}, \mathbf{X}_1^{\text{cat}} \mid \mathbf{S}, D_1 = 1) - \log p(\mathbf{X}_1^{\text{con}}, \mathbf{X}_1^{\text{cat}} \mid \mathbf{S}, D_1 = 0) \\ & - \log \left\{ \sum_{j=1}^{M+1} p(\mathbf{X}_j^{\text{con}}, \mathbf{X}_j^{\text{cat}} \mid \mathbf{S}, D_j = 1) - \log p(\mathbf{X}_j^{\text{con}}, \mathbf{X}_j^{\text{cat}} \mid \mathbf{S}, D_j = 0) \right\} \\ &= \boldsymbol{\phi}^\top \boldsymbol{\Sigma}^{-1}(\mathbf{X}_1^{\text{con}} - \gamma \mathbf{X}_1^{\text{cat}}) + \boldsymbol{\lambda}^\top \mathbf{X}_1^{\text{cat}} \\ & \quad - \left\{ \sum_{j=1}^{M+1} \boldsymbol{\phi}^\top \boldsymbol{\Sigma}^{-1}(\mathbf{X}_j^{\text{con}} - \gamma \mathbf{X}_j^{\text{cat}}) + \boldsymbol{\lambda}^\top \mathbf{X}_j^{\text{cat}} \right\} \end{aligned}$$

This does not depend on  $\mathbf{S}$ , and hence

$$G(\mathbf{x}_1, \dots, \mathbf{x}_{M+1}) = \frac{\exp(\boldsymbol{\beta}_{\text{cat}}^\top \mathbf{x}_1^{\text{cat}} + \boldsymbol{\beta}_{\text{con}}^\top \mathbf{x}_1^{\text{con}})}{\sum_{j=1}^{M+1} \exp(\boldsymbol{\beta}_{\text{cat}}^\top \mathbf{x}_j^{\text{cat}} + \boldsymbol{\beta}_{\text{con}}^\top \mathbf{x}_j^{\text{con}})}$$

with

$$\begin{aligned} \boldsymbol{\beta}_{\text{con}} &= \boldsymbol{\Sigma}^{-1} \boldsymbol{\phi} \\ \boldsymbol{\beta}_{\text{cat}} &= \boldsymbol{\lambda} - \gamma^\top \boldsymbol{\Sigma}^{-1} \boldsymbol{\phi} \end{aligned}$$

**Web Appendix D: Proof that linear regression and multinomial logistic regression conditional models are compatible with the general location model of equations (3) and (4)**

It is obvious from expression (4) that the conditional distribution of any element of  $\mathbf{X}^{\text{con}}$  given  $\mathbf{X}^{\text{cat}}$ ,  $\mathbf{S}$ ,  $D$  and the remaining elements of  $\mathbf{X}^{\text{con}}$  is a normal distribution with mean equal to a linear function of those variables and with constant variance. Since the parameters of the joint normal distribution in expression (4) are unconstrained, so are the parameters describing the mean and variance of this conditional distribution. Therefore, a linear regres-

sion of a partially observed element of  $\mathbf{X}^{\text{con}}$  on  $\mathbf{X}^{\text{cat}}$ ,  $\mathbf{S}$ ,  $D$  and the remaining elements of  $\mathbf{X}^{\text{con}}$  (with main effects only and no interactions) constitutes a conditional model that is compatible (in the sense of Definition 1 of Liu et al., 2014) with the general location model of equations (3) and (4).

Now consider partially observed categorical covariates. By Bayes' Theorem,

$$\begin{aligned}
& \log p(\mathbf{X}^{\text{cat}} \mid \mathbf{X}^{\text{con}}, \mathbf{S}, D) \\
&= \log p(\mathbf{X}^{\text{cat}} \mid \mathbf{S}, D) + \log p(\mathbf{X}^{\text{con}} \mid \mathbf{X}^{\text{cat}}, \mathbf{S}, D) - \log p(\mathbf{X}^{\text{con}} \mid \mathbf{S}, D) \\
&= a(\mathbf{X}^{\text{cat}}, \mathbf{S}; \boldsymbol{\zeta}) + D\boldsymbol{\lambda}^\top \mathbf{X}^{\text{cat}} - \frac{1}{2}(\mathbf{X}^{\text{con}} - \boldsymbol{\alpha} - \phi D - \boldsymbol{\gamma}\mathbf{X}^{\text{cat}} - \boldsymbol{\delta}\mathbf{S})^\top \boldsymbol{\Sigma}^{-1} \\
&\quad \times (\mathbf{X}^{\text{con}} - \boldsymbol{\alpha} - \phi D - \boldsymbol{\gamma}\mathbf{X}^{\text{cat}} - \boldsymbol{\delta}\mathbf{S}) + \text{terms not involving } \mathbf{X}^{\text{cat}} \\
&= a(\mathbf{X}^{\text{cat}}, \mathbf{S}; \boldsymbol{\zeta}) + D\boldsymbol{\lambda}^\top \mathbf{X}^{\text{cat}} - \frac{1}{2}\mathbf{X}^{\text{cat}\top} \boldsymbol{\gamma}^\top \boldsymbol{\Sigma}^{-1} \boldsymbol{\gamma} \mathbf{X}^{\text{cat}} \\
&\quad + \mathbf{X}^{\text{cat}\top} \boldsymbol{\gamma}^\top \boldsymbol{\Sigma}^{-1} (\mathbf{X}^{\text{con}} - \boldsymbol{\alpha} - \phi D - \boldsymbol{\delta}\mathbf{S}) + \text{terms not involving } \mathbf{X}^{\text{cat}} \\
&= a(\mathbf{X}^{\text{cat}}, \mathbf{S}; \boldsymbol{\zeta}) - \boldsymbol{\alpha}^\top \boldsymbol{\Sigma}^{-1} \boldsymbol{\gamma} \mathbf{X}^{\text{cat}} - \mathbf{S}^\top \boldsymbol{\delta}^\top \boldsymbol{\Sigma}^{-1} \boldsymbol{\gamma} \mathbf{X}^{\text{cat}} + D(\boldsymbol{\lambda}^\top - \phi^\top \boldsymbol{\Sigma}^{-1} \boldsymbol{\gamma}) \mathbf{X}^{\text{cat}} \\
&\quad - \frac{1}{2}\mathbf{X}^{\text{cat}\top} \boldsymbol{\gamma}^\top \boldsymbol{\Sigma}^{-1} \boldsymbol{\gamma} \mathbf{X}^{\text{cat}} + \mathbf{X}^{\text{cat}\top} \boldsymbol{\gamma}^\top \boldsymbol{\Sigma}^{-1} \mathbf{X}^{\text{con}} \\
&\quad + \text{terms not involving } \mathbf{X}^{\text{cat}} \tag{14}
\end{aligned}$$

Now write  $\mathbf{X}^{\text{cat}} = (\mathbf{X}_A^{\text{cat}\top}, \mathbf{X}_B^{\text{cat}\top})^\top$ , where  $\mathbf{X}_A^{\text{cat}}$  represents one categorical variable (coded as a vector of dummy indicators), and  $\mathbf{X}_B^{\text{cat}}$  represents the remaining variables in  $\mathbf{X}^{\text{cat}}$ . Also write

$$a(\mathbf{X}^{\text{cat}}, \mathbf{S}; \boldsymbol{\zeta}) = \boldsymbol{\zeta}_1^\top \mathbf{X}_A^{\text{cat}} + \mathbf{X}_B^{\text{cat}\top} \boldsymbol{\zeta}_2 \mathbf{X}_A^{\text{cat}} + \mathbf{S}^\top \boldsymbol{\zeta}_3 \mathbf{X}_A^{\text{cat}} + \text{terms not involving } \mathbf{X}_A^{\text{cat}}$$

To get the distribution of  $\mathbf{X}_A^{\text{cat}}$  given  $\mathbf{X}^{\text{con}}$ ,  $\mathbf{S}$ ,  $D$  and  $\mathbf{X}_B^{\text{cat}}$  we take equation (14) and ignore

all terms not involving  $\mathbf{X}_A^{\text{cat}}$ . The result is

$$\begin{aligned}
& \log p(\mathbf{X}_A^{\text{cat}} \mid \mathbf{X}_B^{\text{cat}}, \mathbf{X}^{\text{con}}, \mathbf{S}, D) \\
&= (\boldsymbol{\zeta}_1^\top - \boldsymbol{\alpha}^\top \boldsymbol{\Sigma}^{-1} \boldsymbol{\gamma}_A) \mathbf{X}_A^{\text{cat}} + \mathbf{X}_B^{\text{cat}\top} \boldsymbol{\zeta}_2 \mathbf{X}_A^{\text{cat}} + \mathbf{S}^\top (\boldsymbol{\zeta}_3 - \boldsymbol{\delta}^\top \boldsymbol{\Sigma}^{-1} \boldsymbol{\gamma}_A) \mathbf{X}_A^{\text{cat}} \\
&\quad + D(\boldsymbol{\lambda}_A^\top - \boldsymbol{\phi}^\top \boldsymbol{\Sigma}^{-1} \boldsymbol{\gamma}_A) \mathbf{X}_A^{\text{cat}} \\
&\quad - \frac{1}{2} \mathbf{X}_A^{\text{cat}\top} \boldsymbol{\gamma}_A^\top \boldsymbol{\Sigma}^{-1} \boldsymbol{\gamma}_A \mathbf{X}_A^{\text{cat}} - \mathbf{X}_B^{\text{cat}\top} \boldsymbol{\gamma}_B^\top \boldsymbol{\Sigma}^{-1} \boldsymbol{\gamma}_A \mathbf{X}_A^{\text{cat}} + \mathbf{X}_A^{\text{cat}\top} \boldsymbol{\gamma}_A^\top \boldsymbol{\Sigma}^{-1} \mathbf{X}^{\text{con}} \\
&\quad + \text{terms not involving } \mathbf{X}_A^{\text{cat}} \\
&= \left( \boldsymbol{\zeta}_1^\top - \boldsymbol{\alpha}^\top \boldsymbol{\Sigma}^{-1} \boldsymbol{\gamma}_A - \frac{1}{2} \text{diag}(\boldsymbol{\gamma}_A^\top \boldsymbol{\Sigma}^{-1} \boldsymbol{\gamma}_A)^\top \right) \mathbf{X}_A^{\text{cat}} + \mathbf{X}_B^{\text{cat}\top} (\boldsymbol{\zeta}_2 - \boldsymbol{\gamma}_B^\top \boldsymbol{\Sigma}^{-1} \boldsymbol{\gamma}_A) \mathbf{X}_A^{\text{cat}} \\
&\quad + \mathbf{S}^\top (\boldsymbol{\zeta}_3 - \boldsymbol{\delta}^\top \boldsymbol{\Sigma}^{-1} \boldsymbol{\gamma}_A) \mathbf{X}_A^{\text{cat}} + D(\boldsymbol{\lambda}_A^\top - \boldsymbol{\phi}^\top \boldsymbol{\Sigma}^{-1} \boldsymbol{\gamma}_A) \mathbf{X}_A^{\text{cat}} \\
&\quad + \mathbf{X}^{\text{con}\top} \boldsymbol{\Sigma}^{-1} \boldsymbol{\gamma}_A \mathbf{X}_A^{\text{cat}} \\
&\quad + \text{terms not involving } \mathbf{X}_A^{\text{cat}} \tag{15}
\end{aligned}$$

where  $\boldsymbol{\gamma}_A$ ,  $\boldsymbol{\gamma}_B$ ,  $\boldsymbol{\lambda}_A$  and  $\boldsymbol{\lambda}_B$  are given by the partitions  $\boldsymbol{\gamma} = [\boldsymbol{\gamma}_A \ \boldsymbol{\gamma}_B]$  and  $\boldsymbol{\lambda} = (\boldsymbol{\lambda}_A^\top, \boldsymbol{\lambda}_B^\top)^\top$ . Note that  $\mathbf{X}_A^{\text{cat}\top} \boldsymbol{\gamma}_A^\top \boldsymbol{\Sigma}^{-1} \boldsymbol{\gamma}_A \mathbf{X}_A^{\text{cat}} = \text{diag}(\boldsymbol{\gamma}_A^\top \boldsymbol{\Sigma}^{-1} \boldsymbol{\gamma}_A)^\top \mathbf{X}_A^{\text{cat}}$  because  $\mathbf{X}_A^{\text{cat}}$  is a vector whose elements all equal zero except for at most one element.

It follows from equation (15) that the distribution of  $\mathbf{X}_A^{\text{cat}}$  given  $\mathbf{X}^{\text{con}}$ ,  $\mathbf{S}$ ,  $D$  and  $\mathbf{X}_B^{\text{cat}}$  follows a multinomial logistic regression with main effects for  $\mathbf{S}$ ,  $\mathbf{X}_B^{\text{cat}}$ ,  $D$  and  $\mathbf{X}^{\text{con}}$ . It can also be seen that, because there are no constraints on the parameters of the general location model of expressions (3) and (4) or on  $\boldsymbol{\zeta}_1$ ,  $\boldsymbol{\zeta}_2$  and  $\boldsymbol{\zeta}_3$ , there are also no constraints on the main-effect parameters in this multinomial logistic regression model. Hence, a multinomial logistic regression of a partially observed categorical variable on  $\mathbf{X}^{\text{con}}$ ,  $\mathbf{S}$ ,  $D$  and the elements of  $\mathbf{X}^{\text{cat}}$  that are not dummy indicators for this categorical variable (with main effects only) constitutes a conditional model that is compatible (in the sense of Definition 1 of Liu et al., 2014) with the general location model of equations (3) and (4).

**Web Appendix E: Proof that equations (6)–(8) imply that (2) holds with**

$$\beta_{\text{cat}} = \tau - \rho^\top (\mathbf{F} - \mathbf{C})\xi \text{ and } \beta_{\text{con}} = (\mathbf{F} - \mathbf{C})\xi$$

Let  $q = \dim(\mathbf{X}^{\text{con}})$ , and let  $\xi_j^* = (\mathbf{0}_{q(j-1)}^\top, \xi^\top, \mathbf{0}_{q(M-j+1)}^\top)^\top$  be a vector of length  $(M+1)q$ , with  $\mathbf{0}_a$  meaning a vector of length  $a$  and composed of zeros. From equations (8)–(9) it can be shown that

$$\begin{aligned} & \log P(\mathbf{X}_1^{\text{con}}, \dots, \mathbf{X}_{M+1}^{\text{con}} \mid \mathbf{X}_1^{\text{cat}}, \dots, \mathbf{X}_{M+1}^{\text{cat}}, D_j = 1, D_1 = \dots = D_{j-1} = D_{j+1} = \dots = D_{M+1} = 0) \\ & - \log P(\mathbf{X}_1^{\text{con}}, \dots, \mathbf{X}_{M+1}^{\text{con}} \mid \mathbf{X}_1^{\text{cat}}, \dots, \mathbf{X}_{M+1}^{\text{cat}}, D_1 = 1, D_2 = \dots = D_{M+1} = 0) \\ & = \begin{bmatrix} \mathbf{X}_1^{\text{con}} - \eta - \rho \mathbf{X}_1^{\text{cat}} - \psi \bar{\mathbf{X}}^{\text{cat}} \\ \vdots \\ \mathbf{X}_{M+1}^{\text{con}} - \eta - \rho \mathbf{X}_{M+1}^{\text{cat}} - \psi \bar{\mathbf{X}}^{\text{cat}} \end{bmatrix}^\top \begin{bmatrix} \Lambda + \Omega & \Omega & \dots & \Omega & \Omega \\ \Omega & \Lambda + \Omega & & \Omega & \Omega \\ \vdots & & \ddots & & \vdots \\ \Omega & \Omega & & \Lambda + \Omega & \Omega \\ \Omega & \Omega & \dots & \Omega & \Lambda + \Omega \end{bmatrix}^{-1} \\ & \times (\xi_j^* - \xi_1^*) \end{aligned} \tag{16}$$

Now, using the following lemma, it can be shown that

$$\begin{aligned} & \begin{bmatrix} \mathbf{X}_1^{\text{con}} - \eta - \rho \mathbf{X}_1^{\text{cat}} - \psi \bar{\mathbf{X}}^{\text{cat}} \\ \vdots \\ \mathbf{X}_{M+1}^{\text{con}} - \eta - \rho \mathbf{X}_{M+1}^{\text{cat}} - \psi \bar{\mathbf{X}}^{\text{cat}} \end{bmatrix}^\top \begin{bmatrix} \Lambda + \Omega & \Omega & \dots & \Omega & \Omega \\ \Omega & \Lambda + \Omega & & \Omega & \Omega \\ \vdots & & \ddots & & \vdots \\ \Omega & \Omega & & \Lambda + \Omega & \Omega \\ \Omega & \Omega & \dots & \Omega & \Lambda + \Omega \end{bmatrix}^{-1} \xi_j^* \\ & = (\mathbf{X}_j^{\text{con}} - \eta - \rho \mathbf{X}_j^{\text{cat}} - \psi \bar{\mathbf{X}}^{\text{cat}})^\top (\mathbf{C} - \mathbf{F})\xi \\ & \quad + \sum_{k=1}^{M+1} (\mathbf{X}_k^{\text{con}} - \eta - \rho \mathbf{X}_k^{\text{cat}} - \psi \bar{\mathbf{X}}^{\text{cat}})^\top \mathbf{F}\xi \end{aligned} \tag{17}$$



From equations (6), (8), (16) and (17), it can be shown that

$$\begin{aligned}
 G(\mathbf{x}_1^{\text{cat}}, \mathbf{x}_1^{\text{con}}, \dots, \mathbf{x}_{M+1}^{\text{cat}}, \mathbf{x}_{M+1}^{\text{con}}) &= \frac{\exp \left\{ \begin{array}{l} \boldsymbol{\tau}^\top \mathbf{x}_1^{\text{cat}} + \mathbf{x}_1^{\text{con}\top} (\mathbf{F} - \mathbf{C}) \boldsymbol{\xi} - \mathbf{x}_1^{\text{cat}\top} \boldsymbol{\rho}^\top (\mathbf{F} - \mathbf{C}) \boldsymbol{\xi} \\ - \bar{\mathbf{x}}_1^{\text{cat}\top} \boldsymbol{\psi}^\top (\mathbf{F} - \mathbf{C}) \boldsymbol{\xi} \end{array} \right\}}{\sum_{j=1}^{M+1} \exp \left\{ \begin{array}{l} \boldsymbol{\tau}^\top \mathbf{x}_j^{\text{cat}} + \mathbf{x}_j^{\text{con}\top} (\mathbf{F} - \mathbf{C}) \boldsymbol{\xi} - \mathbf{x}_j^{\text{cat}\top} \boldsymbol{\rho}^\top (\mathbf{F} - \mathbf{C}) \boldsymbol{\xi} \\ - \bar{\mathbf{x}}_j^{\text{cat}\top} \boldsymbol{\psi}^\top (\mathbf{F} - \mathbf{C}) \boldsymbol{\xi} \end{array} \right\}} \\
 &= \frac{\exp \{ \boldsymbol{\tau}^\top \mathbf{x}_1^{\text{cat}} + \boldsymbol{\xi}^\top (\mathbf{F} - \mathbf{C}) \mathbf{x}_1^{\text{con}} - \boldsymbol{\xi}^\top (\mathbf{F} - \mathbf{C}) \boldsymbol{\rho} \mathbf{x}_1^{\text{cat}} \}}{\sum_{j=1}^{M+1} \exp \{ \boldsymbol{\tau}^\top \mathbf{x}_j^{\text{cat}} + \boldsymbol{\xi}^\top (\mathbf{F} - \mathbf{C}) \mathbf{x}_j^{\text{con}} - \boldsymbol{\xi}^\top (\mathbf{F} - \mathbf{C}) \boldsymbol{\rho} \mathbf{x}_j^{\text{cat}} \}} \\
 &= \frac{\exp [ \{ \boldsymbol{\tau} - \boldsymbol{\rho}^\top (\mathbf{F} - \mathbf{C}) \boldsymbol{\xi} \}^\top \mathbf{x}_1^{\text{cat}} + \boldsymbol{\xi}^\top (\mathbf{F} - \mathbf{C}) \mathbf{x}_1^{\text{con}} ]}{\sum_{j=1}^{M+1} \exp [ \{ \boldsymbol{\tau} - \boldsymbol{\rho}^\top (\mathbf{F} - \mathbf{C}) \boldsymbol{\xi} \}^\top \mathbf{x}_j^{\text{cat}} + \boldsymbol{\xi}^\top (\mathbf{F} - \mathbf{C}) \mathbf{x}_j^{\text{con}} ]}
 \end{aligned}$$

*Lemma*

If  $\boldsymbol{\Lambda}$  and  $\boldsymbol{\Omega}$  are invertible, symmetric  $n \times n$  matrices and  $M \geq 1$ , then the inverse of the  $(M+1)n \times (M+1)n$  matrix

$$\begin{bmatrix}
 \boldsymbol{\Lambda} + \boldsymbol{\Omega} & \boldsymbol{\Omega} & \dots & \boldsymbol{\Omega} & \boldsymbol{\Omega} \\
 \boldsymbol{\Omega} & \boldsymbol{\Lambda} + \boldsymbol{\Omega} & & \boldsymbol{\Omega} & \boldsymbol{\Omega} \\
 \vdots & & \ddots & & \vdots \\
 \boldsymbol{\Omega} & \boldsymbol{\Omega} & & \boldsymbol{\Lambda} + \boldsymbol{\Omega} & \boldsymbol{\Omega} \\
 \boldsymbol{\Omega} & \boldsymbol{\Omega} & \dots & \boldsymbol{\Omega} & \boldsymbol{\Lambda} + \boldsymbol{\Omega}
 \end{bmatrix}$$

is given by

$$\begin{bmatrix}
 \boldsymbol{\Lambda} + \boldsymbol{\Omega} & \boldsymbol{\Omega} & \dots & \boldsymbol{\Omega} & \boldsymbol{\Omega} \\
 \boldsymbol{\Omega} & \boldsymbol{\Lambda} + \boldsymbol{\Omega} & & \boldsymbol{\Omega} & \boldsymbol{\Omega} \\
 \vdots & & \ddots & & \vdots \\
 \boldsymbol{\Omega} & \boldsymbol{\Omega} & & \boldsymbol{\Lambda} + \boldsymbol{\Omega} & \boldsymbol{\Omega} \\
 \boldsymbol{\Omega} & \boldsymbol{\Omega} & \dots & \boldsymbol{\Omega} & \boldsymbol{\Lambda} + \boldsymbol{\Omega}
 \end{bmatrix}^{-1} = \begin{bmatrix}
 \mathbf{C} & \mathbf{F} & \dots & \mathbf{F} & \mathbf{F} \\
 \mathbf{F} & \mathbf{C} & & \mathbf{F} & \mathbf{F} \\
 \vdots & & \ddots & & \vdots \\
 \mathbf{F} & \mathbf{F} & & \mathbf{C} & \mathbf{F} \\
 \mathbf{F} & \mathbf{F} & \dots & \mathbf{F} & \mathbf{C}
 \end{bmatrix}$$

where

$$\mathbf{C}^{-1} = \boldsymbol{\Lambda} + \boldsymbol{\Omega} - \boldsymbol{\Omega}(\boldsymbol{\Lambda} + M\boldsymbol{\Omega})^{-1}M\boldsymbol{\Omega}$$

$$\mathbf{F} = -(\boldsymbol{\Lambda} + M\boldsymbol{\Omega})^{-1}\boldsymbol{\Omega}\mathbf{C}$$

This result is easily verified. Note that  $\mathbf{C}$  and  $\mathbf{F}$  are symmetric.

**Web Appendix F: Proof that linear regression and multinomial logistic regression conditional models are compatible with the general location model of equations (6)–(9)**

First, consider a continuous covariate. It follows from expressions (8)–(9) that

$$\mathbf{X}_j^{\text{con}} \mid \left\{ \begin{array}{l} \mathbf{X}_1^{\text{cat}}, \dots, \mathbf{X}_{M+1}^{\text{cat}}, \mathbf{X}_1^{\text{con}}, \dots, \mathbf{X}_{j-1}^{\text{con}}, \mathbf{X}_{j+1}^{\text{con}}, \dots, \mathbf{X}_{M+1}^{\text{con}}, \\ D_1 = 1, D_2 = \dots = D_{M+1} = 0 \end{array} \right\} \sim N(\boldsymbol{\mu}_j, \boldsymbol{\Lambda}') \quad (18)$$

with

$$\boldsymbol{\mu}_j = \boldsymbol{\eta} + \boldsymbol{\xi}D_j + \boldsymbol{\rho}\mathbf{X}_j^{\text{cat}} + \boldsymbol{\psi}\bar{\mathbf{X}}^{\text{cat}} + [\boldsymbol{\Omega}, \dots, \boldsymbol{\Omega}]$$

$$\times \begin{bmatrix} \mathbf{C}' & \mathbf{F}' & \dots & \mathbf{F}' & \mathbf{F}' \\ \mathbf{F}' & \mathbf{C}' & & \mathbf{F}' & \mathbf{F}' \\ \vdots & & \ddots & & \vdots \\ \mathbf{F}' & \mathbf{F}' & & \mathbf{C}' & \mathbf{F}' \\ \mathbf{F}' & \mathbf{F}' & \dots & \mathbf{F}' & \mathbf{C}' \end{bmatrix} \begin{bmatrix} \mathbf{X}_1^{\text{con}} - \boldsymbol{\eta} - \boldsymbol{\xi}D_1 - \boldsymbol{\rho}\mathbf{X}_1^{\text{cat}} - \boldsymbol{\psi}\bar{\mathbf{X}}^{\text{cat}} \\ \vdots \\ \mathbf{X}_{j-1}^{\text{con}} - \boldsymbol{\eta} - \boldsymbol{\xi}D_{j-1} - \boldsymbol{\rho}\mathbf{X}_{j-1}^{\text{cat}} - \boldsymbol{\psi}\bar{\mathbf{X}}^{\text{cat}} \\ \vdots \\ \mathbf{X}_{j+1}^{\text{con}} - \boldsymbol{\eta} - \boldsymbol{\xi}D_{j+1} - \boldsymbol{\rho}\mathbf{X}_{j+1}^{\text{cat}} - \boldsymbol{\psi}\bar{\mathbf{X}}^{\text{cat}} \\ \vdots \\ \mathbf{X}_{M+1}^{\text{con}} - \boldsymbol{\eta} - \boldsymbol{\xi}D_{M+1} - \boldsymbol{\rho}\mathbf{X}_{M+1}^{\text{cat}} - \boldsymbol{\psi}\bar{\mathbf{X}}^{\text{cat}} \end{bmatrix}$$

where the  $M \times M$  matrices  $\mathbf{C}'$  and  $\mathbf{F}'$  are the same as the  $(M+1) \times (M+1)$  matrices  $\mathbf{C}$  and  $\mathbf{F}$  but with  $M$  replaced by  $(M-1)$  and the final row and final column missing. Hence,

$$\begin{aligned}
\boldsymbol{\mu}_j &= \boldsymbol{\eta} + \boldsymbol{\xi}D_j + \boldsymbol{\rho}\mathbf{X}_j^{\text{cat}} + \boldsymbol{\psi}\bar{\mathbf{X}}^{\text{cat}} \\
&\quad + \boldsymbol{\Omega}\{\mathbf{C}' + (M-1)\mathbf{F}'\} \sum_{k \neq j} (\mathbf{X}_k^{\text{con}} - \boldsymbol{\eta} - \boldsymbol{\xi}D_k - \boldsymbol{\rho}\mathbf{X}_k^{\text{cat}} - \boldsymbol{\psi}\bar{\mathbf{X}}^{\text{cat}}) \\
&= [\mathbf{I} - \boldsymbol{\Omega}\{\mathbf{C}' + (M-1)\mathbf{F}'\}M]\boldsymbol{\eta} + \boldsymbol{\xi}D_j \\
&\quad + \left[ \boldsymbol{\rho} + \frac{1}{M+1}\boldsymbol{\psi} - \boldsymbol{\Omega}\{\mathbf{C}' + (M-1)\mathbf{F}'\} \frac{M}{M+1}\boldsymbol{\psi} \right] \mathbf{X}_j^{\text{cat}} \\
&\quad + \boldsymbol{\Omega}\{\mathbf{C}' + (M-1)\mathbf{F}'\} \sum_{k \neq j} \mathbf{X}_k^{\text{con}} - \boldsymbol{\Omega}\{\mathbf{C}' + (M-1)\mathbf{F}'\} \boldsymbol{\xi} \sum_{k \neq j} D_k \\
&\quad + \left[ \frac{1}{M+1}\boldsymbol{\psi} - \boldsymbol{\Omega}\{\mathbf{C}' + (M-1)\mathbf{F}'\} \boldsymbol{\rho} - \boldsymbol{\Omega}\{\mathbf{C}' + (M-1)\mathbf{F}'\} \frac{M}{M+1}\boldsymbol{\psi} \right] \sum_{k \neq j} \mathbf{X}_k^{\text{cat}} \\
&= [\mathbf{I} - \boldsymbol{\Omega}\{\mathbf{C}' + (M-1)\mathbf{F}'\}M]\boldsymbol{\eta} + [I(j=1) - \boldsymbol{\Omega}\{\mathbf{C}' + (M-1)\mathbf{F}'\}I(j \neq 1)]\boldsymbol{\xi} \\
&\quad + \left[ \boldsymbol{\rho} + \frac{1}{M+1}\boldsymbol{\psi} - \boldsymbol{\Omega}\{\mathbf{C}' + (M-1)\mathbf{F}'\} \frac{M}{M+1}\boldsymbol{\psi} \right] \mathbf{X}_j^{\text{cat}} \\
&\quad + \boldsymbol{\Omega}\{\mathbf{C}' + (M-1)\mathbf{F}'\} \sum_{k \neq j} \mathbf{X}_k^{\text{con}} \\
&\quad + \left[ \frac{1}{M+1}\boldsymbol{\psi} - \boldsymbol{\Omega}\{\mathbf{C}' + (M-1)\mathbf{F}'\} \boldsymbol{\rho} - \boldsymbol{\Omega}\{\mathbf{C}' + (M-1)\mathbf{F}'\} \frac{M}{M+1}\boldsymbol{\psi} \right] \\
&\quad \times \sum_{k \neq j} \mathbf{X}_k^{\text{cat}} \tag{19}
\end{aligned}$$

Line (19) follows because  $D_1, \dots, D_{M+1}$  sum to one. Also,

$$\begin{aligned}
\boldsymbol{\Lambda}' &= \boldsymbol{\Lambda} + \boldsymbol{\Omega} - [\boldsymbol{\Omega}, \dots, \boldsymbol{\Omega}] \begin{bmatrix} \mathbf{C}' & \mathbf{F}' & \dots & \mathbf{F}' & \mathbf{F}' \\ \mathbf{F}' & \mathbf{C}' & & \mathbf{F}' & \mathbf{F}' \\ \vdots & & \ddots & \vdots & \\ \mathbf{F}' & \mathbf{F}' & & \mathbf{C}' & \mathbf{F}' \\ \mathbf{F}' & \mathbf{F}' & \dots & \mathbf{F}' & \mathbf{C}' \end{bmatrix} \begin{bmatrix} \boldsymbol{\Omega} \\ \vdots \\ \boldsymbol{\Omega} \end{bmatrix} \\
&= \boldsymbol{\Lambda} + \boldsymbol{\Omega} - M\boldsymbol{\Omega}\{\mathbf{C}' + (M-1)\mathbf{F}'\}\boldsymbol{\Omega}
\end{aligned}$$

Note that the right-hand side of equation (19) is a linear combination of  $\mathbf{X}_j^{\text{cat}}$ ,  $\sum_{k \neq j} \mathbf{X}_k^{\text{cat}}$ ,  $\sum_{k \neq j} \mathbf{X}_k^{\text{con}}$ , and that  $\boldsymbol{\Lambda}'$  does not depend on any of the variables.

Now partition  $\mathbf{X}_j^{\text{con}}$  as  $\mathbf{X}_j^{\text{con}} = (\mathbf{X}_{jA}^{\text{con}\top}, \mathbf{X}_{jB}^{\text{con}\top})^\top$ , where  $X_{jA}^{\text{con}}$  denotes a single element of

$\mathbf{X}_j^{\text{con}}$ . It follows from expression (18) that the distribution of  $X_{jA}^{\text{con}}$  given the other variables is

$$X_{jA}^{\text{con}} \mid \left\{ \begin{array}{l} \mathbf{X}_{jB}^{\text{con}}, \mathbf{X}_1^{\text{cat}}, \dots, \mathbf{X}_{M+1}^{\text{cat}}, \mathbf{X}_1^{\text{con}}, \dots, \mathbf{X}_{j-1}^{\text{con}}, \mathbf{X}_{j+1}^{\text{con}}, \dots, \mathbf{X}_{M+1}^{\text{con}}, \\ D_1 = 1, D_2 = \dots = D_{M+1} = 0 \end{array} \right\} \sim N(\mu_{jA}, \Lambda'')$$

where  $\mu_{jA}$  is a linear combination of  $\mathbf{X}_j^{\text{cat}}$ ,  $\sum_{k \neq j} \mathbf{X}_k^{\text{cat}}$ ,  $\sum_{k \neq j} \mathbf{X}_k^{\text{con}}$  and  $\mathbf{X}_{jB}^{\text{con}}$ , and where  $\Lambda''$ , like  $\Lambda'$ , is not a function of the variables.

Since the parameters in equation (8) are unconstrained, it can be seen from expression (18) that the parameters relating the mean of  $\mathbf{X}_j^{\text{con}}$  to  $\mathbf{X}_j^{\text{cat}}$ ,  $\sum_{k \neq j} \mathbf{X}_k^{\text{cat}}$  and  $\sum_{k \neq j} \mathbf{X}_k^{\text{con}}$  are unconstrained. Thus, the parameters relating the mean of  $\mu_{jA}$  to  $\mathbf{X}_j^{\text{cat}}$ ,  $\sum_{k \neq j} \mathbf{X}_k^{\text{cat}}$ ,  $\sum_{k \neq j} \mathbf{X}_k^{\text{con}}$  and  $\mathbf{X}_{jB}^{\text{con}}$  are also unconstrained. Therefore a linear regression of a partially observed element of  $\mathbf{X}_j^{\text{con}}$  on  $\mathbf{X}_j^{\text{cat}}$ ,  $\sum_{k \neq j} \mathbf{X}_k^{\text{cat}}$ ,  $\sum_{k \neq j} \mathbf{X}_k^{\text{con}}$  and the remaining elements of  $\mathbf{X}_j^{\text{con}}$  (with main effects only and no interactions) constitutes a conditional model that is compatible (in the sense of Definition 1 of Liu et al., 2014) with the general location model of expressions (6)–(8).

Second, consider a categorical covariate. Using equation (9.28) of Schafer (1997), it follows from expressions (6), (7) and (8) that

$$\begin{aligned} & P(\mathbf{X}_1^{\text{cat}} = \mathbf{x}_1^{\text{cat}}, \dots, \mathbf{X}_{M+1}^{\text{cat}} = \mathbf{x}_{M+1}^{\text{cat}} \mid \mathbf{X}_1^{\text{con}}, \dots, \mathbf{X}_{M+1}^{\text{con}}, D_1 = 1, D_2 = \dots = D_{M+1} = 0) \\ &= \frac{\exp\{b(\mathbf{x}_1^{\text{cat}}, \dots, \mathbf{x}_{M+1}^{\text{cat}}; \boldsymbol{\nu}) + \boldsymbol{\tau}^\top \mathbf{x}_1^{\text{cat}} + c(\mathbf{x}_1^{\text{cat}}, \dots, \mathbf{x}_{M+1}^{\text{cat}})\}}{\sum_{\mathbf{x}_1^{\text{cat}'}, \dots, \mathbf{x}_{M+1}^{\text{cat}'}} \exp\{b(\mathbf{x}_1^{\text{cat}'}, \dots, \mathbf{x}_{M+1}^{\text{cat}'}; \boldsymbol{\nu}) + \boldsymbol{\tau}^\top \mathbf{x}_1^{\text{cat}'} + c(\mathbf{x}_1^{\text{cat}'}, \dots, \mathbf{x}_{M+1}^{\text{cat}'})\}} \end{aligned} \quad (20)$$

where

$$\begin{aligned}
& c(\mathbf{x}_1^{\text{cat}}, \dots, \mathbf{x}_{M+1}^{\text{cat}}) \\
&= \begin{bmatrix} \boldsymbol{\eta} + \boldsymbol{\xi}D_1 + \boldsymbol{\rho}\mathbf{x}_1^{\text{cat}} + \boldsymbol{\psi}\bar{\mathbf{x}}^{\text{cat}} \\ \vdots \\ \boldsymbol{\eta} + \boldsymbol{\xi}D_{M+1} + \boldsymbol{\rho}\mathbf{x}_{M+1}^{\text{cat}} + \boldsymbol{\psi}\bar{\mathbf{x}}^{\text{cat}} \end{bmatrix}^\top \begin{bmatrix} \mathbf{C} & \mathbf{F} & \dots & \mathbf{F} & \mathbf{F} \\ \mathbf{F} & \mathbf{C} & & \mathbf{F} & \mathbf{F} \\ \vdots & & \ddots & \vdots & \\ \mathbf{F} & \mathbf{F} & & \mathbf{C} & \mathbf{F} \\ \mathbf{F} & \mathbf{F} & \dots & \mathbf{F} & \mathbf{C} \end{bmatrix} \begin{bmatrix} \mathbf{X}_1^{\text{con}} \\ \vdots \\ \mathbf{X}_{M+1}^{\text{con}} \end{bmatrix} \\
&= \frac{1}{2} \begin{bmatrix} \boldsymbol{\eta} + \boldsymbol{\xi}D_1 + \boldsymbol{\rho}\mathbf{x}_1^{\text{cat}} + \boldsymbol{\psi}\bar{\mathbf{x}}^{\text{cat}} \\ \vdots \\ \boldsymbol{\eta} + \boldsymbol{\xi}D_{M+1} + \boldsymbol{\rho}\mathbf{x}_{M+1}^{\text{cat}} + \boldsymbol{\psi}\bar{\mathbf{x}}^{\text{cat}} \end{bmatrix}^\top \begin{bmatrix} \mathbf{C} & \mathbf{F} & \dots & \mathbf{F} & \mathbf{F} \\ \mathbf{F} & \mathbf{C} & & \mathbf{F} & \mathbf{F} \\ \vdots & & \ddots & \vdots & \\ \mathbf{F} & \mathbf{F} & & \mathbf{C} & \mathbf{F} \\ \mathbf{F} & \mathbf{F} & \dots & \mathbf{F} & \mathbf{C} \end{bmatrix} \\
&\quad \times \begin{bmatrix} \boldsymbol{\eta} + \boldsymbol{\xi}D_1 + \boldsymbol{\rho}\mathbf{x}_1^{\text{cat}} + \boldsymbol{\psi}\bar{\mathbf{x}}^{\text{cat}} \\ \vdots \\ \boldsymbol{\eta} + \boldsymbol{\xi}D_{M+1} + \boldsymbol{\rho}\mathbf{x}_{M+1}^{\text{cat}} + \boldsymbol{\psi}\bar{\mathbf{x}}^{\text{cat}} \end{bmatrix} \\
&= \sum_{j=1}^{M+1} (\boldsymbol{\eta} + \boldsymbol{\xi}D_j + \boldsymbol{\rho}\mathbf{x}_j^{\text{cat}} + \boldsymbol{\psi}\bar{\mathbf{x}}^{\text{cat}})^\top \left\{ \mathbf{C} \left( \mathbf{X}_j^{\text{con}} - \frac{1}{2}(\boldsymbol{\eta} + \boldsymbol{\xi}D_j + \boldsymbol{\rho}\mathbf{x}_j^{\text{cat}} + \boldsymbol{\psi}\bar{\mathbf{x}}^{\text{cat}}) \right) \right. \\
&\quad \left. + \mathbf{F} \sum_{k \neq j} \left( \mathbf{X}_k^{\text{con}} - \frac{1}{2}(\boldsymbol{\eta} + \boldsymbol{\xi}D_k + \boldsymbol{\rho}\mathbf{x}_k^{\text{cat}} + \boldsymbol{\psi}\bar{\mathbf{x}}^{\text{cat}}) \right) \right\} \quad (21)
\end{aligned}$$

Now partition  $\mathbf{X}_j^{\text{cat}}$  as  $\mathbf{X}_j^{\text{cat}} = (\mathbf{X}_{jA}^{\text{cat}\top}, \mathbf{X}_{jB}^{\text{cat}\top})^\top$ , where  $\mathbf{X}_{jA}^{\text{cat}}$  denotes the subvector of  $\mathbf{X}_j^{\text{cat}}$  that consists of the dummy indicators for a single categorical covariate, and partition  $\mathbf{x}_j^{\text{cat}}$  analogously. To obtain the distribution of  $\mathbf{X}_{jA}^{\text{cat}}$  given  $\mathbf{X}_{jB}^{\text{cat}}, \mathbf{X}_1^{\text{cat}}, \dots, \mathbf{X}_{j-1}^{\text{cat}}, \mathbf{X}_{j+1}^{\text{cat}}, \dots, \mathbf{X}_{M+1}^{\text{cat}}, \mathbf{X}_1^{\text{con}}, \dots, \mathbf{X}_{M+1}^{\text{con}}, D_1 = 1$  and  $D_2 = \dots = D_{M+1} = 0$ , we can take equation (20) and ignore

terms not involving  $\mathbf{x}_{jA}^{\text{cat}}$ . Using equation (21) it can be shown that

$$\begin{aligned}
& b(\mathbf{x}_1^{\text{cat}}, \dots, \mathbf{x}_{M+1}^{\text{cat}}; \boldsymbol{\nu}) + \boldsymbol{\tau}^\top \mathbf{x}_1^{\text{cat}} + c(\mathbf{x}_1^{\text{cat}}, \dots, \mathbf{x}_{M+1}^{\text{cat}}) \\
&= \mathbf{u}_{1j}^\top \mathbf{x}_{jA}^{\text{cat}} + \mathbf{x}_{jB}^{\text{cat}\top} \mathbf{U}_2 \mathbf{x}_{jA}^{\text{cat}} + \mathbf{X}_j^{\text{con}\top} \mathbf{U}_3 \mathbf{x}_{jA}^{\text{cat}} + \sum_{k \neq j} \mathbf{X}_k^{\text{cat}\top} \mathbf{U}_4 \mathbf{x}_{jA}^{\text{cat}} + \sum_{k \neq j} \mathbf{X}_k^{\text{con}\top} \mathbf{U}_5 \mathbf{x}_{jA}^{\text{cat}} \\
&\quad + \text{terms not involving } \mathbf{x}_{jA}^{\text{cat}}
\end{aligned} \tag{22}$$

where  $\mathbf{u}_{1j}$  is a vector function of  $\boldsymbol{\nu}$  and the parameters in equation (21), and  $\mathbf{U}_2, \dots, \mathbf{U}_5$  are matrix functions of the same set of parameters. From equations (20) and (22) it can be seen that the distribution of  $\mathbf{X}_{jA}^{\text{cat}}$  given  $\mathbf{X}_{jB}^{\text{cat}}, \mathbf{X}_1^{\text{cat}}, \dots, \mathbf{X}_{j-1}^{\text{cat}}, \mathbf{X}_{j+1}^{\text{cat}}, \dots, \mathbf{X}_{M+1}^{\text{cat}}, \mathbf{X}_1^{\text{con}}, \dots, \mathbf{X}_{M+1}^{\text{con}}, D_1 = 1$  and  $D_2 = \dots = D_{M+1} = 0$  has the form of a multinomial logistic regression with main effects for  $\mathbf{X}_j^{\text{con}}, \sum_{k \neq j} \mathbf{X}_k^{\text{con}}, \sum_{k \neq j} \mathbf{X}_k^{\text{cat}}$  and  $\mathbf{X}_{jB}^{\text{cat}}$ .

The inclusion of  $b(\mathbf{x}_1^{\text{cat}}, \dots, \mathbf{x}_{M+1}^{\text{cat}}; \boldsymbol{\nu})$  with unconstrained  $\boldsymbol{\nu}$  ensures that  $\mathbf{u}_{1j}, \mathbf{U}_2$  and  $\mathbf{U}_4$  are unconstrained. Therefore, it only remains to check that  $\mathbf{U}_3$  and  $\mathbf{U}_5$  are unconstrained. It can be shown that

$$\begin{aligned}
\mathbf{U}_3 &= \mathbf{C}\{\boldsymbol{\rho}_A + \boldsymbol{\psi}_A(M+1)^{-1}\} + \mathbf{F}\boldsymbol{\psi}_A M(M+1)^{-2} \\
\mathbf{U}_5 &= \mathbf{C}\boldsymbol{\psi}_A(M+1)^{-1} + \mathbf{F}\{\boldsymbol{\rho}_A + \boldsymbol{\psi}_A M(M+1)^{-1}\}
\end{aligned}$$

where  $\boldsymbol{\rho}_A$  and  $\boldsymbol{\psi}_A$  are given by the partitions  $\boldsymbol{\rho} = [\boldsymbol{\rho}_A \ \boldsymbol{\rho}_B]$  and  $\boldsymbol{\psi} = [\boldsymbol{\psi}_A \ \boldsymbol{\psi}_B]$ . Since  $\boldsymbol{\rho}_A$  and  $\boldsymbol{\psi}_A$  are unconstrained, so are  $\mathbf{U}_3$  and  $\mathbf{U}_5$ . So, none of the parameters in the multinomial logistic regression is constrained. Hence, this multinomial logistic regression is compatible (in the sense of Definition 1 of Liu et al., 2014) with the general location model of expressions (6)–(8).

## Web Appendix G: Additional simulation studies with misspecified models

We simulated datasets using data-generating mechanisms that made the imputation models of all our MI methods misspecified. In the first, data were simulated with an interaction

between  $S^{\text{cat}}$  and  $S^{\text{con}}$ ; in the second,  $X^{\text{conA}}$  and  $X^{\text{conB}}$  were log-normally distributed. We now detail these two data-generating mechanisms, before giving the results.

*Sensitivity analysis 1: interaction between  $S^{\text{cat}}$  and  $S^{\text{con}}$*

The data-generating process used in the main simulations (Section 6) assumed that the conditional distribution of  $(X^{\text{conA}}, X^{\text{conB}})$  given  $X^{\text{cat}}, S^{\text{cat}}, S^{\text{con}}$  and  $D$  was bivariate normal with univariate marginal distributions  $N(0.5X^{\text{cat}} + 0.5S^{\text{cat}} + 0.5S^{\text{con}} + 0.5D, 1)$  and covariance 0.5. We modified this data-generating process by changing the univariate marginal distributions to  $N(0.5X^{\text{cat}} + 0.5S^{\text{cat}} + 0.5S^{\text{con}} + 0.5S^{\text{cat}}S^{\text{con}} + 0.5D, 1)$ , thus including an interaction term that was not present in the imputation models. The rest of the data-generating process was the same as that used in the main simulations, including the application of the MCAR, MAR-A and MAR-B missingness mechanisms with 10% or 25% missingness. One thousand simulated datasets, each with  $N = 500$  cases and 500 matched controls ( $M = 1$ ), were generated.

*Sensitivity analysis 2: log normally distributed  $X^{\text{conA}}$  and  $X^{\text{conB}}$*

We simulated data for a matched case-control study as follows. First, data on a population of 15000 independent individuals were generated. For each individual in this population, variables  $S^{\text{cat}}, S^{\text{con}}, X^{\text{cat}}, X^{\text{conA}}, X^{\text{conB}}$  and  $D$  were generated. Binary variable  $S^{\text{cat}}$  and continuous variable  $S^{\text{con}}$  were generated independently using  $P(S^{\text{cat}} = 1) = 0.5$  and  $S^{\text{con}} \sim \text{Normal}(0, 1)$ . Binary variable  $X^{\text{cat}}$  was generated with logit  $P(X^{\text{cat}} = 1 \mid S^{\text{cat}}, S^{\text{con}}) = -2.5 + 0.5S^{\text{cat}} + 0.5S^{\text{con}}$ . Continuous variables  $X^{\text{conA}}$  and  $X^{\text{conB}}$  were generated using  $X^{\text{conA}} = 0.5X^{\text{cat}} + 0.5S^{\text{cat}} + 0.5S^{\text{con}} + \exp(e_A)$  and  $X^{\text{conB}} = 0.5X^{\text{cat}} + 0.5S^{\text{cat}} + 0.5S^{\text{con}} + \exp(e_B)$ , where  $(e_A, e_B)$  was bivariate normally distributed with zero mean and unit variance, independently of  $S^{\text{cat}}, S^{\text{con}}$  and  $X^{\text{cat}}$ . The covariance of  $(e_A, e_B)$  was chosen so that the covariance between  $X^{\text{conA}}$  and  $X^{\text{conB}}$  conditional on  $X^{\text{cat}}, S^{\text{cat}}$  and  $S^{\text{con}}$  was approximately 0.5, as

it was in the main simulations. Binary variable  $D$  was generated using logit  $P(D = 1 \mid S^{\text{cat}}, S^{\text{con}}, X^{\text{cat}}, X^{\text{conA}}, X^{\text{conB}}) = -4.68 + 0.25S^{\text{cat}} + 0.25S^{\text{con}} + \frac{5}{12}X^{\text{cat}} + \frac{1}{3}X^{\text{conA}} + \frac{1}{3}X^{\text{conB}}$ . The intercept of  $-4.68$  was chosen to give  $P(D = 1) = 0.05$ , i.e. a 5% population prevalence of disease.

Having generated data on this population of 15000 individuals, 500 individuals with  $D = 1$  were randomly drawn from it. These are the 500 cases. One individual with  $D = 0$  was then matched with each case on  $S^{\text{cat}}$  and  $S^{\text{con}}$ . These are the 500 matching controls. Finally, missingness was randomly imposed on this matched case-control sample using the same MCAR, MAR-A and MAR-B mechanisms with 10% or 25% missingness that were used in the main simulation study.

This entire process (i.e. simulation of population and sampling of cases and controls) was repeated 1000 times to generate 1000 matched case-control study datasets.

### *Results*

Web Tables 11–13 and 14–16 show the results for the first and second sensitivity analyses, respectively. It can be seen that the MI methods are reasonably robust to the imputation model misspecifications.

## **Web Appendix H: Application of MI methods in Stata and R**

Here we provide the Stata or R code that we used to perform MI in the simulation study when there were  $M = 4$  controls per case, for each of the methods outlined in the paper, along with a specimen simulated dataset. Text files of the Stata and R code given below and the files containing the simulated dataset are available as a web supplement at the Biometrics website. The dataset is provided as a Stata file (simulated\_data.dta) and as a comma-separated-values file (simulated\_data.csv).



In the dataset the three covariates  $X^{\text{cat}}$ ,  $X^{\text{conA}}$  and  $X^{\text{conB}}$  are denoted `xcat`, `xconA` and `xconB`, respectively. The categorical and continuous matching variables  $S^{\text{cat}}$  and  $S^{\text{con}}$  are denoted respectively as `scat` and `scon`, and the case or control status is denoted `d`. There are missing values in  $X^{\text{conA}}$  and  $X^{\text{conB}}$ , which were generated completely at random to give approximately 25% of the values missing in each variable.

We specify a seed at the start of each block of code, so that the results are reproducible. The results of applying the code to the simulated dataset provided are shown in Web Table 17. The results from the complete case analysis are also shown; this analysis can be performed in, for example, Stata using `clogit d xcat xconA xconB , group(set)`.

#### *FCS MI using matching variables*

This analysis was performed in Stata using the `ice` command, as shown below.

```
use simulated_data.dta, clear

set seed 780423

ice d xcat xconA xconB i.scat scon, /*
*/ eq(xcat: d xconA xconB _Iscat_1 scon, xconA: d xcat xconB _Iscat_1 scon)/*
*/ m(50) clear

* fit the analysis model to each imputed dataset and combine using Rubin's Rules
mim: clogit d xcat xconA xconB , group(set)
```

#### *Normal MI using matching variables*

This analysis was performed in Stata using `mi impute`, as shown below. Adaptive rounding is used post-imputation to assign values 0 or 1 for missing values in `xcat`.

```
use simulated_data.dta, clear

set seed 780423
```

```

mi set mlong
mi register imputed xcat xconA
mi register regular d xconB scat scon

mi impute mvn xcat xconA = d xconB i.scat scon, add(50)

* apply adaptive rounding for xcat
mi passive: egen thres_mean=mean(xcat)
mi passive: gen thres=thres_mean-invnormal(thres_mean)*sqrt(thres_mean*(1-thres_mean))
replace xcat=0 if xcat<=thres & _mi_m!=0 & xcat!=0 & xcat!=1
replace xcat=1 if xcat>thres & _mi_m!=0 & xcat!=0 & xcat!=1

* fit the analysis model to each imputed dataset and combine using Rubin's Rules
mim: clogit d xcat xconA xconB , group(set)

```

Adaptive rounding does not apply for non-binary categorical variables, which should be represented by a series of dummy variables. Non-binary categorical variables can be handled using the approach outlined by Carpenter and Kenward (2013, Section 5.2). In this approach, if the imputed values of all the dummy variables are less than 0.5, then the most common category is assigned; otherwise, the category with the highest imputed value is assigned. The categories of the categorical variable are first ordered so that the most frequently occurring category is the reference category. This was the approach used in the EPIC example.

#### *Latent normal MI using matching variables*

This analysis was performed in R using the `jomo1mix` function in the ‘jomo’ package. The ‘jomo’, ‘survival’ and ‘mice’ libraries are required. The `jomo1mix` function requires a dataframe containing continuous variables with missing values (`data.cont`), a dataframe containing categorical variables with missing values (`data.cat`), and a dataframe containing the outcome, the fully observed variables (including the matching variables) and a vector of ones (`data.x.matrix`). The number of categories in the categorical variable with missing

values is indicated by `Y_numcat=2` (this becomes a vector if there is more than one categorical variable with missing values). Categorical variables with missing values must take ordered integer values starting at 1. A loop is used to fit the conditional logistic regression in each imputed dataset, and the stored results are combined using the `pool.scalar` function, which is in the ‘mice’ package. In the output from `pool.scalar` the pooled estimate is given by `qbar` and its variance is given by `t`.

```
data<-read.table("simulated_data.csv",sep=" ",header=T)

set.seed(780423)

n.imp <- 50 # number of imputations

data.cont<-data.frame(data$xconA)
data.cat<-data.frame(data$xcat)+1
data.x.matrix<-data.frame(rep(1,length(data$ccid)),data$scat,data$scon,data$xconB,data$d)

myjomo<-jomo1mix(Y_con=data.cont, Y_cat=data.cat, Y_numcat=2, X=data.x.matrix,nimp=n.imp)

#fit the analysis model to each imputed dataset
coef<-matrix(nrow=n.imp,ncol=3)
var<-matrix(nrow=n.imp,ncol=3)
for(k in 1:n.imp){
  imp.data<-data.frame(myjomo[myjomo$Imputation==k,],data$set)
  model.imp<-clogit(data.d~data.xcat+data.xconA+data.xconB+strata(data.set),data=imp.data)
  coef[k,]<-model.imp$coef
  var[k,]<-diag(model.imp$var)
}

# combine using Rubin's Rules
pool.scalar(coef[,1],var[,1])
pool.scalar(coef[,2],var[,2])
pool.scalar(coef[,3],var[,3])
```

*FCS MI using matched set*

This analysis was performed in Stata using the `ice` command, as shown below. First, the dataset was transformed to ‘wide’ format using the `reshape` command, i.e. so that there is one row per matched set. Then, within each matched set,  $\sum_{k \neq j} X_k^{\text{cat}}$ ,  $\sum_{k \neq j} X_k^{\text{conA}}$  and  $\sum_{k \neq j} X_k^{\text{conB}}$  were calculated for  $j = 1, \dots, 5$ . These are denoted as ‘`xcatsum1`’, ..., ‘`xcatsum5`’, ‘`xconAsum1`’, ..., ‘`xconAsum5`’, and ‘`xconBsum1`’, ..., ‘`xconBsum5`’. Note the following features of the `ice` command used for this analysis. First, the option ‘`eq(xcat1: xconA1 xconB1 xcatsum1 xconAsum1 xconBsum1)`’ tells `ice` that the conditional model for `xcat1` is a regression of `xcat1` on `xconA1`, `xconB1`, `xcatsum1`, `xconAsum1` and `xconBsum1`. Without this option, `xcat1` would be regressed (by default) on all the other covariates. Second, the option ‘`passive(xcatsum1:(xcat2+xcat3+xcat4+xcat5))`’ tells `ice` what `xcatsum1` means: it is a variable that is equal to the sum of `xcat2`, `xcat3`, `xcat4` and `xcat5`.

Finally, the imputed datasets were transformed back to ‘long’ format, i.e. so that there is one row per individual (we used the ‘`reshape`’ command in Stata), before analysing them using conditional logistic regression and combining the results using Rubin’s Rules.

```
use simulated_data.dta, clear

set seed 780423

reshape wide

forval i=1/5{
  gen xcatsum`i'=.
  gen xconAsum`i'=.
}

gen xconBsum1=xconB2+xconB3+xconB4+xconB5
gen xconBsum2=xconB1+xconB3+xconB4+xconB5
gen xconBsum3=xconB1+xconB2+xconB4+xconB5
```

```

gen xconBsum4=xconB1+xconB2+xconB3+xconB5
gen xconBsum5=xconB1+xconB2+xconB3+xconB4

ice d1 xcat1 xconA1 xconB1 d2 xcat2 xconA2 xconB2 d3 xcat3 xconA3 xconB3 d4 xcat4 xconA4 xconB4 /*
*/ d5 xcat5 xconA5 xconB5 xcatsum1 xcatsum2 xcatsum3 xcatsum4 xcatsum5 xconAsum1 xconAsum2 /*
*/ xconAsum3 xconAsum4 xconAsum5 xconBsum1 xconBsum2 xconBsum3 xconBsum4 xconBsum5, /*
*/ eq(xcat1: xconA1 xconB1 xcatsum1 xconAsum1 xconBsum1,/*
*/ xcat2: xconA2 xconB2 xcatsum2 xconAsum2 xconBsum2,/*
*/ xcat3: xconA3 xconB3 xcatsum3 xconAsum3 xconBsum3,/*
*/ xcat4: xconA4 xconB4 xcatsum4 xconAsum4 xconBsum4,/*
*/ xcat5: xconA5 xconB5 xcatsum5 xconAsum5 xconBsum5,/*
*/ xconA1: xcat1 xconB1 xconAsum1 xcatsum1 xconBsum1,/*
*/ xconA2: xcat2 xconB2 xconAsum2 xcatsum2 xconBsum2,/*
*/ xconA3: xcat3 xconB3 xconAsum3 xcatsum3 xconBsum3,/*
*/ xconA4: xcat4 xconB4 xconAsum4 xcatsum4 xconBsum4,/*
*/ xconA5: xcat5 xconB5 xconAsum5 xcatsum5 xconBsum5) /*
*/ passive(xcatsum1:(xcat2+xcat3+xcat4+xcat5)\/*
*/ xcatsum2:(xcat1+xcat3+xcat4+xcat5)\/*
*/ xcatsum3:(xcat2+xcat1+xcat4+xcat5)\/*
*/ xcatsum4:(xcat2+xcat3+xcat1+xcat5)\/*
*/ xcatsum5:(xcat2+xcat3+xcat4+xcat1)\/*
*/ xconAsum1:(xconA2+xconA3+xconA4+xconA5)\/*
*/ xconAsum2:(xconA1+xconA3+xconA4+xconA5)\/*
*/ xconAsum3:(xconA2+xconA1+xconA4+xconA5)\/*
*/ xconAsum4:(xconA2+xconA3+xconA1+xconA5)\/*
*/ xconAsum5:(xconA2+xconA3+xconA4+xconA1)/*
*/ ) m(50) saving(name_of_output_file.dta, replace) clear

use name_of_output_file.dta, clear

mi import ice, automatic

mi reshape long d xcat xconA xconB, i(set) j(setpos)

* fit the analysis model to each imputed dataset and combine using Rubin's Rules
mim: clogit d xcat xconA xconB , group(set)

```

*Normal MI using matched set*

This analysis was performed in R using the `pan` function in the ‘pan’ package. The ‘pan’, ‘survival’ and ‘mice’ libraries are required. The `pan` function requires a data frame containing the model covariates (`y`), a data frame containing the outcome and a vector of 1s (`x`), and a data frame containing the matched set variable (`set`). The model covariates without missing values could alternatively be included in `x`. It is necessary to set up an array that stores the imputed datasets (`y.imp`) and also to specify the random seeds used to perform the imputations (`seeds.n.imp`). Adaptive rounding is used post-imputation to assign values 0 or 1 for missing values in `xcat` (note that a different approach is required for non-binary categorical variables, as described in the section on Normal MI using matching variables). A loop is used to fit the conditional logistic regression to each imputed dataset and the stored results are combined using the `pool.scalar` function, which is in the ‘mice’ package. In the output from `pool.scalar` the pooled estimate is given by `qbar` and its variance is given by `t`.

```
data<-read.table("simulated_data.csv",sep="," ,header=T)

set.seed(780423)

N <- 500 # number of matching sets
setsize <- 5 # the number of individuals in a matching set
n.imp <- 50 # number of imputations
nvar <- 3 # number of covariates (xcat, xconA and xconB in this case)
set.seed(10)
seeds <- floor( runif(1000) * 1e6 )

y <- as.matrix( data[, c("xcat", "xconA", "xconB")] )
set <- data[, "set"]
x <- cbind(1, data[, "d"])

y.imp <- array(0, c(N*setsize, nvar, n.imp)) # Set up array to store imputations
```

```

# Get random seeds for all imputations

seeds.n.imp <- floor( runif(n.imp) * 1e6 )

# The first imputation is performed separately, then subsequent imputations
# restart Gibbs sampler from the final state of a previous run

imp.pan <- pan(y=y, subj=set, pred=x, xcol=1:2, zcol=1,
              prior=list(a=nvar, Binv=diag(nvar, nvar), c=nvar, Dinv=diag(nvar, nvar)),
              seeds.n.imp[1], iter=1000)

# first imputed dataset
y.imp[, ,1] <- imp.pan$y
# apply adaptive rounding
thres.mean<-mean(y.imp[, ,1])
thres<-thres.mean-qnorm(thres.mean)*sqrt(thres.mean*(1-thres.mean))
assign_zero<-(y.imp[, ,1]<=thres & y.imp[, ,1]!=0 & y.imp[, ,1]!=1)|y.imp[, ,1]==0
y.imp[, ,1]<-ifelse(assign_zero==1,0,1)

# imputations 2:n.imp
for (j in 2:n.imp)
{
  imp.pan <- pan(y=y, subj=set, pred=x, xcol=1:2, zcol=1,
                prior=list(a=nvar, Binv=diag(nvar, nvar), c=nvar, Dinv=diag(nvar, nvar)),
                seed=seeds.n.imp[j], iter=1000, start=imp.pan$last)
  y.imp[, ,j] <- imp.pan$y
  # apply adaptive rounding
  thres.mean<-mean(y.imp[, ,j])
  thres<-thres.mean-qnorm(thres.mean)*sqrt(thres.mean*(1-thres.mean))
  assign_zero<-(y.imp[, ,j]<=thres & y.imp[, ,j]!=0 & y.imp[, ,j]!=1)|y.imp[, ,j]==0
  y.imp[, ,j]<-ifelse(assign_zero==1,0,1)
}

# fit the analysis model to each imputed dataset
coef<-matrix(nrow=n.imp,ncol=3)
var<-matrix(nrow=n.imp,ncol=3)

```

```

for (j in 1:n.imp){
  model.imp<-clogit(data$d ~ y.imp[,j] + strata(data$set))
  coef[j,]<-model.imp$coef
  var[j,]<-diag(model.imp$var)
}

# combine using Rubin's Rules
pool.scalar(coef[,1],var[,1])
pool.scalar(coef[,2],var[,2])
pool.scalar(coef[,3],var[,3])

```

### *Latent normal MI using matched set*

This analysis was performed in R using the `jomo1ranmix` function in the ‘jomo’ package. The ‘jomo’, ‘survival’ and ‘mice’ libraries are required. Like `jomo1mix`, the `jomo1ranmix` function requires a dataframe containing continuous variables with missing values (`data.cont`), a dataframe containing categorical variables with missing values (`data.cat`), and a dataframe containing the outcome, the fully observed variables (including the matching variables) and a vector of ones (`data.x.matrix`). The number of categories in the categorical variable with missing values is indicated by `Y_numcat=2`. The clustering variable, which here is matched set, is indicated in `jomo1ranmix` by `clus=set`. The clustering variable must take ordered integer values starting at 0. As with `jomo1mix`, categorical variables with missing values must take ordered integer values starting at 1. A loop is used to fit the conditional logistic regression to each imputed dataset and the stored results are combined using the `pool.scalar` function, which is in the ‘mice’ package. In the output from `pool.scalar` the pooled estimate is given by `qbar` and its variance is given by `t`.

```

data<-read.table("simulated_data.csv",sep="," ,header=T)

set.seed(780423)

set<-data.frame(data$set-1)

```



```
n.imp <- 50 # number of imputations

data.cont<-data.frame(data$xconA)
data.cat<-data.frame(data$xcat)+1
data.x.matrix<-data.frame(rep(1,length(data$ccid)),data$xconB,data$d)

myjomo<-jomolranmix(Y_con=data.cont, Y_cat=data.cat, Y_numcat=2, X=data.x.matrix,
                   clus=set,nimp=n.imp)

coef<-matrix(nrow=n.imp,ncol=3)
var<-matrix(nrow=n.imp,ncol=3)
for(k in 1:n.imp){
  imp.data<-data.frame(myjomo[myjomo$Imputation==k,],data$set)
  model.imp<-clogit(data.d~data.xcat+data.xconA+data.xconB+strata(data.set),data=imp.data)
  coef[k,]<-model.imp$coef
  var[k,]<-diag(model.imp$var)
}

# combine using Rubin's Rules
pool.scalar(coef[,1],var[,1])
pool.scalar(coef[,2],var[,2])
pool.scalar(coef[,3],var[,3])
```

## References

- Carpenter J. and Kenward M. (2013) *Multiple Imputation and its Applications*. Wiley, New Jersey.
- Hughes, R.A., White, I.R., Seaman, S.R., Carpenter, J.R., Tilling, K. and Sterne, J.A.C. (2014) Joint modelling rationale for chained equations. *BMC Medical Research Methodology* 14, 28.
- Lee, K.J. and Carlin, J.B. (2010) Multiple imputation for missing data: fully conditional

specification versus multivariate normal imputation. *American Journal of Epidemiology* 171, 624–632.

Little, R.J.A. and Rubin, D.B. (2002) *Statistical Analysis With Missing Data*. Wiley, New Jersey.

Liu, J., Gelman, A., Hill, J., Su, Y.S. and Kropko, J. (2014) On the stationary distribution of iterative imputations. *Biometrika* 101, 155–173.

Schafer J.L. (1997) *Analysis of Incomplete Multivariate Data*. Chapman and Hall, London.

van Buuren, S. (2012) *Flexible Imputation of Missing Data*. Chapman & Hall/CRC.

|                    | $X^{\text{cat}}$ |       |       |      |    | $X^{\text{conA}}$ |       |       |      |    | $X^{\text{conB}}$ |       |       |      |    |
|--------------------|------------------|-------|-------|------|----|-------------------|-------|-------|------|----|-------------------|-------|-------|------|----|
|                    | LOR              | SE    | estSE | MSE  | cv | LOR               | SE    | estSE | MSE  | cv | LOR               | SE    | estSE | MSE  | cv |
| Complete data      | 0.426            | 0.213 | 0.206 | 45.3 | 94 | 0.336             | 0.078 | 0.082 | 6.15 | 96 | 0.337             | 0.083 | 0.082 | 6.88 | 95 |
| <b>10% missing</b> |                  |       |       |      |    |                   |       |       |      |    |                   |       |       |      |    |
| Complete cases     | 0.432            | 0.275 | 0.263 | 76.1 | 95 | 0.338             | 0.097 | 0.101 | 9.47 | 96 | 0.328             | 0.102 | 0.101 | 10.5 | 95 |
| Match var: FCS     | 0.430            | 0.222 | 0.221 | 49.6 | 95 | 0.336             | 0.082 | 0.087 | 6.72 | 96 | 0.337             | 0.084 | 0.084 | 7.12 | 94 |
| Normal             | 0.407            | 0.212 | 0.219 | 45.1 | 96 | 0.337             | 0.082 | 0.087 | 6.75 | 96 | 0.339             | 0.084 | 0.083 | 7.11 | 94 |
| Latent norm        | 0.434            | 0.221 | 0.221 | 49.3 | 96 | 0.331             | 0.080 | 0.087 | 6.47 | 96 | 0.339             | 0.084 | 0.084 | 7.10 | 95 |
| Match set: FCS     | 0.430            | 0.226 | 0.221 | 51.1 | 95 | 0.334             | 0.083 | 0.088 | 6.88 | 96 | 0.338             | 0.085 | 0.084 | 7.19 | 94 |
| Normal             | 0.422            | 0.222 | 0.226 | 49.4 | 96 | 0.340             | 0.085 | 0.089 | 7.24 | 96 | 0.335             | 0.085 | 0.084 | 7.28 | 94 |
| Latent norm        | 0.439            | 0.225 | 0.223 | 50.9 | 96 | 0.320             | 0.080 | 0.087 | 6.58 | 96 | 0.341             | 0.085 | 0.084 | 7.25 | 95 |
| <b>25% missing</b> |                  |       |       |      |    |                   |       |       |      |    |                   |       |       |      |    |
| Complete cases     | 0.456            | 0.400 | 0.398 | 162  | 96 | 0.339             | 0.143 | 0.143 | 20.5 | 96 | 0.320             | 0.148 | 0.144 | 22.1 | 94 |
| Match var: FCS     | 0.430            | 0.243 | 0.247 | 59.2 | 96 | 0.336             | 0.090 | 0.096 | 8.03 | 97 | 0.337             | 0.087 | 0.086 | 7.56 | 95 |
| Normal             | 0.375            | 0.216 | 0.240 | 48.5 | 97 | 0.339             | 0.089 | 0.095 | 7.93 | 97 | 0.342             | 0.086 | 0.086 | 7.54 | 95 |
| Latent norm        | 0.442            | 0.240 | 0.245 | 58.4 | 95 | 0.323             | 0.085 | 0.095 | 7.27 | 97 | 0.343             | 0.086 | 0.086 | 7.45 | 95 |
| Match set: FCS     | 0.429            | 0.254 | 0.251 | 64.5 | 96 | 0.332             | 0.094 | 0.097 | 8.81 | 96 | 0.341             | 0.088 | 0.087 | 7.88 | 94 |
| Normal             | 0.408            | 0.241 | 0.259 | 58.2 | 96 | 0.347             | 0.098 | 0.101 | 9.81 | 96 | 0.333             | 0.090 | 0.088 | 8.12 | 95 |
| Latent norm        | 0.451            | 0.255 | 0.254 | 66.2 | 95 | 0.298             | 0.085 | 0.095 | 8.48 | 95 | 0.347             | 0.089 | 0.088 | 8.07 | 95 |

Web Table 1: Results from 1000 simulated datasets of  $N = 500$  cases and  $M = 1$  control per case with MAR-A missingness mechanism. ‘LOR’ is mean estimated log odds ratio, ‘SE’ is empirical standard error, ‘estSE’ is mean estimated standard error, ‘MSE’ is mean squared error  $\times 1000$ , and ‘cv’ is coverage of 95% confidence interval. True log odds ratios are 0.417, 0.333 and 0.333 for  $X^{\text{cat}}$ ,  $X^{\text{conA}}$  and  $X^{\text{conB}}$ , respectively.

|                    | $X^{\text{cat}}$ |       |       |      |    | $X^{\text{conA}}$ |       |       |      |    | $X^{\text{conB}}$ |       |       |      |    |
|--------------------|------------------|-------|-------|------|----|-------------------|-------|-------|------|----|-------------------|-------|-------|------|----|
|                    | LOR              | SE    | estSE | MSE  | cv | LOR               | SE    | estSE | MSE  | cv | LOR               | SE    | estSE | MSE  | cv |
| Complete data      | 0.426            | 0.213 | 0.206 | 45.3 | 94 | 0.336             | 0.078 | 0.082 | 6.15 | 96 | 0.337             | 0.083 | 0.082 | 6.88 | 95 |
| <b>10% missing</b> |                  |       |       |      |    |                   |       |       |      |    |                   |       |       |      |    |
| Complete cases     | 0.428            | 0.269 | 0.262 | 72.7 | 95 | 0.338             | 0.096 | 0.099 | 9.26 | 97 | 0.269             | 0.101 | 0.100 | 14.4 | 89 |
| Match var: FCS     | 0.430            | 0.221 | 0.220 | 48.9 | 95 | 0.335             | 0.082 | 0.087 | 6.74 | 97 | 0.337             | 0.084 | 0.084 | 7.14 | 94 |
| Normal             | 0.395            | 0.212 | 0.219 | 45.3 | 96 | 0.337             | 0.082 | 0.087 | 6.77 | 97 | 0.340             | 0.084 | 0.083 | 7.11 | 95 |
| Latent norm        | 0.434            | 0.219 | 0.220 | 48.4 | 95 | 0.331             | 0.081 | 0.087 | 6.5  | 97 | 0.340             | 0.084 | 0.084 | 7.11 | 94 |
| Match set: FCS     | 0.430            | 0.225 | 0.221 | 50.7 | 95 | 0.332             | 0.083 | 0.087 | 6.91 | 96 | 0.339             | 0.085 | 0.084 | 7.23 | 95 |
| Normal             | 0.414            | 0.223 | 0.226 | 49.6 | 96 | 0.338             | 0.085 | 0.088 | 7.25 | 96 | 0.337             | 0.085 | 0.084 | 7.31 | 94 |
| Latent norm        | 0.437            | 0.225 | 0.222 | 51   | 95 | 0.319             | 0.080 | 0.087 | 6.6  | 96 | 0.342             | 0.085 | 0.084 | 7.29 | 95 |
| <b>25% missing</b> |                  |       |       |      |    |                   |       |       |      |    |                   |       |       |      |    |
| Complete cases     | 0.439            | 0.395 | 0.390 | 156  | 96 | 0.339             | 0.136 | 0.138 | 18.5 | 96 | 0.197             | 0.143 | 0.138 | 39.1 | 82 |
| Match var: FCS     | 0.431            | 0.242 | 0.246 | 58.8 | 95 | 0.336             | 0.089 | 0.095 | 7.95 | 96 | 0.337             | 0.087 | 0.086 | 7.6  | 95 |
| Normal             | 0.351            | 0.218 | 0.240 | 52   | 96 | 0.340             | 0.089 | 0.095 | 7.91 | 97 | 0.343             | 0.087 | 0.086 | 7.6  | 95 |
| Latent norm        | 0.440            | 0.239 | 0.245 | 57.9 | 95 | 0.323             | 0.085 | 0.094 | 7.27 | 97 | 0.344             | 0.086 | 0.086 | 7.54 | 95 |
| Match set: FCS     | 0.431            | 0.253 | 0.252 | 64.2 | 95 | 0.330             | 0.093 | 0.097 | 8.73 | 96 | 0.342             | 0.089 | 0.087 | 7.93 | 95 |
| Normal             | 0.391            | 0.243 | 0.259 | 59.6 | 96 | 0.344             | 0.098 | 0.100 | 9.7  | 96 | 0.336             | 0.090 | 0.088 | 8.16 | 94 |
| Latent norm        | 0.449            | 0.253 | 0.253 | 65   | 95 | 0.296             | 0.084 | 0.095 | 8.52 | 95 | 0.348             | 0.089 | 0.087 | 8.08 | 95 |

Web Table 2: Results from 1000 simulated datasets of  $N = 500$  cases and  $M = 1$  control per case with MAR-B missingness mechanism. ‘LOR’ is mean estimated log odds ratio, ‘SE’ is empirical standard error, ‘estSE’ is mean estimated standard error, ‘MSE’ is mean squared error  $\times 1000$ , and ‘cv’ is coverage of 95% confidence interval. True log odds ratios are 0.417, 0.333 and 0.333 for  $X^{\text{cat}}$ ,  $X^{\text{conA}}$  and  $X^{\text{conB}}$ , respectively.

|                    | $X^{\text{cat}}$ |       |       |      |    | $X^{\text{conA}}$ |       |       |      |    | $X^{\text{conB}}$ |       |       |      |    |
|--------------------|------------------|-------|-------|------|----|-------------------|-------|-------|------|----|-------------------|-------|-------|------|----|
|                    | LOR              | SE    | estSE | MSE  | cv | LOR               | SE    | estSE | MSE  | cv | LOR               | SE    | estSE | MSE  | cv |
| Complete data      | 0.418            | 0.150 | 0.144 | 22.4 | 94 | 0.334             | 0.058 | 0.061 | 3.37 | 97 | 0.337             | 0.062 | 0.061 | 3.89 | 94 |
| <b>10% missing</b> |                  |       |       |      |    |                   |       |       |      |    |                   |       |       |      |    |
| Complete cases     | 0.415            | 0.182 | 0.175 | 33.1 | 94 | 0.333             | 0.068 | 0.071 | 4.66 | 96 | 0.329             | 0.074 | 0.071 | 5.48 | 94 |
| Match var: FCS     | 0.417            | 0.160 | 0.155 | 25.6 | 94 | 0.334             | 0.062 | 0.065 | 3.79 | 96 | 0.337             | 0.064 | 0.062 | 4.07 | 94 |
| Normal             | 0.398            | 0.155 | 0.155 | 24.4 | 95 | 0.336             | 0.061 | 0.065 | 3.78 | 97 | 0.339             | 0.064 | 0.062 | 4.09 | 94 |
| Latent norm        | 0.422            | 0.159 | 0.155 | 25.3 | 94 | 0.330             | 0.061 | 0.065 | 3.68 | 97 | 0.339             | 0.063 | 0.062 | 4.07 | 94 |
| Match set: FCS     | 0.415            | 0.161 | 0.156 | 26.0 | 94 | 0.332             | 0.061 | 0.065 | 3.75 | 97 | 0.338             | 0.064 | 0.062 | 4.09 | 94 |
| Normal             | 0.404            | 0.157 | 0.156 | 24.9 | 95 | 0.336             | 0.062 | 0.065 | 3.86 | 97 | 0.339             | 0.064 | 0.062 | 4.09 | 94 |
| Latent norm        | 0.421            | 0.161 | 0.156 | 25.9 | 94 | 0.319             | 0.060 | 0.065 | 3.83 | 96 | 0.341             | 0.064 | 0.062 | 4.15 | 94 |
| <b>25% missing</b> |                  |       |       |      |    |                   |       |       |      |    |                   |       |       |      |    |
| Complete cases     | 0.407            | 0.259 | 0.241 | 67.2 | 94 | 0.334             | 0.089 | 0.093 | 7.87 | 97 | 0.320             | 0.096 | 0.094 | 9.43 | 94 |
| Match var: FCS     | 0.416            | 0.180 | 0.175 | 32.4 | 94 | 0.335             | 0.069 | 0.072 | 4.77 | 96 | 0.337             | 0.066 | 0.064 | 4.35 | 95 |
| Normal             | 0.372            | 0.166 | 0.170 | 29.6 | 94 | 0.338             | 0.069 | 0.071 | 4.75 | 96 | 0.342             | 0.066 | 0.064 | 4.37 | 94 |
| Latent norm        | 0.427            | 0.177 | 0.174 | 31.5 | 94 | 0.323             | 0.066 | 0.071 | 4.43 | 97 | 0.343             | 0.065 | 0.064 | 4.33 | 94 |
| Match set: FCS     | 0.411            | 0.184 | 0.176 | 33.9 | 94 | 0.330             | 0.069 | 0.073 | 4.79 | 96 | 0.340             | 0.066 | 0.064 | 4.42 | 95 |
| Normal             | 0.388            | 0.173 | 0.176 | 30.8 | 94 | 0.340             | 0.071 | 0.073 | 5.04 | 96 | 0.339             | 0.066 | 0.064 | 4.44 | 94 |
| Latent norm        | 0.426            | 0.181 | 0.176 | 33.0 | 94 | 0.299             | 0.065 | 0.071 | 5.45 | 94 | 0.347             | 0.067 | 0.065 | 4.64 | 94 |

Web Table 3: Results from 1000 simulated datasets of  $N = 500$  cases and  $M = 4$  controls per case with MAR-A missingness mechanism. ‘LOR’ is mean estimated log odds ratio, ‘SE’ is empirical standard error, ‘estSE’ is mean estimated standard error, ‘MSE’ is mean squared error  $\times 1000$ , and ‘cv’ is coverage of 95% confidence interval. True log odds ratios are 0.417, 0.333 and 0.333 for  $X^{\text{cat}}$ ,  $X^{\text{conA}}$  and  $X^{\text{conB}}$ , respectively.

|                    | $X^{\text{cat}}$ |       |       |      |    | $X^{\text{conA}}$ |       |       |      |    | $X^{\text{conB}}$ |       |       |      |    |
|--------------------|------------------|-------|-------|------|----|-------------------|-------|-------|------|----|-------------------|-------|-------|------|----|
|                    | LOR              | SE    | estSE | MSE  | cv | LOR               | SE    | estSE | MSE  | cv | LOR               | SE    | estSE | MSE  | cv |
| Complete data      | 0.418            | 0.150 | 0.144 | 22.4 | 94 | 0.334             | 0.058 | 0.061 | 3.37 | 97 | 0.337             | 0.062 | 0.061 | 3.89 | 94 |
| <b>10% missing</b> |                  |       |       |      |    |                   |       |       |      |    |                   |       |       |      |    |
| Complete cases     | 0.407            | 0.184 | 0.176 | 33.8 | 94 | 0.334             | 0.067 | 0.071 | 4.55 | 96 | 0.266             | 0.073 | 0.071 | 9.9  | 83 |
| Match var: FCS     | 0.416            | 0.160 | 0.156 | 25.5 | 94 | 0.334             | 0.061 | 0.065 | 3.76 | 97 | 0.337             | 0.064 | 0.062 | 4.09 | 94 |
| Normal             | 0.378            | 0.155 | 0.155 | 25.3 | 95 | 0.336             | 0.061 | 0.065 | 3.75 | 97 | 0.340             | 0.064 | 0.062 | 4.11 | 94 |
| Latent norm        | 0.419            | 0.158 | 0.156 | 25.1 | 95 | 0.329             | 0.060 | 0.065 | 3.64 | 97 | 0.340             | 0.064 | 0.062 | 4.09 | 94 |
| Match set: FCS     | 0.415            | 0.161 | 0.157 | 26   | 95 | 0.332             | 0.061 | 0.065 | 3.74 | 97 | 0.339             | 0.064 | 0.062 | 4.14 | 94 |
| Normal             | 0.388            | 0.156 | 0.157 | 25.3 | 95 | 0.335             | 0.062 | 0.065 | 3.81 | 97 | 0.340             | 0.064 | 0.062 | 4.13 | 94 |
| Latent norm        | 0.416            | 0.159 | 0.157 | 25.4 | 95 | 0.319             | 0.060 | 0.065 | 3.8  | 96 | 0.342             | 0.064 | 0.062 | 4.21 | 94 |
| <b>25% missing</b> |                  |       |       |      |    |                   |       |       |      |    |                   |       |       |      |    |
| Complete cases     | 0.397            | 0.262 | 0.243 | 69.1 | 94 | 0.334             | 0.087 | 0.092 | 7.65 | 97 | 0.190             | 0.096 | 0.092 | 29.8 | 64 |
| Match var: FCS     | 0.415            | 0.182 | 0.177 | 33   | 95 | 0.335             | 0.069 | 0.072 | 4.77 | 97 | 0.337             | 0.066 | 0.064 | 4.36 | 94 |
| Normal             | 0.335            | 0.168 | 0.172 | 34.7 | 93 | 0.340             | 0.069 | 0.072 | 4.78 | 96 | 0.344             | 0.066 | 0.064 | 4.42 | 94 |
| Latent norm        | 0.421            | 0.178 | 0.176 | 31.7 | 95 | 0.323             | 0.065 | 0.072 | 4.36 | 97 | 0.343             | 0.065 | 0.064 | 4.33 | 95 |
| Match set: FCS     | 0.411            | 0.188 | 0.180 | 35.5 | 94 | 0.330             | 0.070 | 0.074 | 4.89 | 96 | 0.340             | 0.067 | 0.065 | 4.53 | 94 |
| Normal             | 0.355            | 0.173 | 0.177 | 33.7 | 94 | 0.339             | 0.071 | 0.073 | 5.02 | 96 | 0.342             | 0.066 | 0.065 | 4.47 | 95 |
| Latent norm        | 0.417            | 0.181 | 0.179 | 32.9 | 96 | 0.298             | 0.066 | 0.072 | 5.55 | 95 | 0.348             | 0.067 | 0.065 | 4.73 | 94 |

Web Table 4: Results from 1000 simulated datasets of  $N = 500$  cases and  $M = 4$  controls per case with MAR-B missingness mechanism. ‘LOR’ is mean estimated log odds ratio, ‘SE’ is empirical standard error, ‘estSE’ is mean estimated standard error, ‘MSE’ is mean squared error  $\times 1000$ , and ‘cv’ is coverage of 95% confidence interval. True log odds ratios are 0.417, 0.333 and 0.333 for  $X^{\text{cat}}$ ,  $X^{\text{conA}}$  and  $X^{\text{conB}}$ , respectively.

|                    | $X^{\text{cat}}$ |       |       |     |    | $X^{\text{conA}}$ |       |       |      |    | $X^{\text{conB}}$ |       |       |      |    |
|--------------------|------------------|-------|-------|-----|----|-------------------|-------|-------|------|----|-------------------|-------|-------|------|----|
|                    | LOR              | SE    | estSE | MSE | cv | LOR               | SE    | estSE | MSE  | cv | LOR               | SE    | estSE | MSE  | cv |
| Complete data      | 0.454            | 0.489 | 0.488 | 240 | 97 | 0.351             | 0.194 | 0.191 | 38   | 95 | 0.353             | 0.196 | 0.191 | 38.8 | 96 |
| <b>10% missing</b> |                  |       |       |     |    |                   |       |       |      |    |                   |       |       |      |    |
| Complete cases     | 0.460            | 0.628 | 0.625 | 396 | 97 | 0.359             | 0.258 | 0.242 | 67.4 | 96 | 0.362             | 0.259 | 0.242 | 67.6 | 95 |
| Match var: FCS     | 0.463            | 0.516 | 0.523 | 268 | 97 | 0.354             | 0.207 | 0.204 | 43.1 | 96 | 0.353             | 0.200 | 0.195 | 40.3 | 96 |
| Normal             | 0.444            | 0.495 | 0.521 | 246 | 98 | 0.354             | 0.207 | 0.204 | 43.1 | 96 | 0.354             | 0.200 | 0.195 | 40.3 | 96 |
| Latent norm        | 0.470            | 0.518 | 0.523 | 271 | 98 | 0.348             | 0.203 | 0.204 | 41.3 | 96 | 0.355             | 0.199 | 0.195 | 40.1 | 96 |
| Match set: FCS     | 0.459            | 0.519 | 0.527 | 271 | 97 | 0.353             | 0.212 | 0.206 | 45.5 | 96 | 0.355             | 0.202 | 0.195 | 41.1 | 96 |
| Normal             | 0.454            | 0.509 | 0.538 | 260 | 98 | 0.363             | 0.217 | 0.210 | 48.1 | 95 | 0.349             | 0.203 | 0.197 | 41.5 | 96 |
| Latent norm        | 0.483            | 0.531 | 0.533 | 286 | 97 | 0.341             | 0.202 | 0.206 | 40.9 | 97 | 0.354             | 0.202 | 0.197 | 41.1 | 96 |
| <b>25% missing</b> |                  |       |       |     |    |                   |       |       |      |    |                   |       |       |      |    |
| Complete cases     | 0.347            | 0.932 | 0.965 | 873 | 98 | 0.416             | 0.477 | 0.393 | 235  | 96 | 0.404             | 0.462 | 0.392 | 218  | 97 |
| Match var: FCS     | 0.462            | 0.565 | 0.587 | 322 | 98 | 0.357             | 0.227 | 0.228 | 52.3 | 97 | 0.355             | 0.205 | 0.202 | 42.7 | 96 |
| Normal             | 0.410            | 0.502 | 0.569 | 252 | 99 | 0.358             | 0.225 | 0.227 | 51   | 96 | 0.358             | 0.204 | 0.202 | 42.1 | 96 |
| Latent norm        | 0.484            | 0.562 | 0.586 | 321 | 98 | 0.340             | 0.211 | 0.225 | 44.7 | 97 | 0.362             | 0.202 | 0.202 | 41.5 | 96 |
| Match set: FCS     | 0.433            | 0.569 | 0.606 | 324 | 98 | 0.356             | 0.240 | 0.234 | 58.3 | 96 | 0.362             | 0.211 | 0.206 | 45.3 | 96 |
| Normal             | 0.433            | 0.548 | 0.622 | 301 | 98 | 0.388             | 0.259 | 0.249 | 70   | 96 | 0.341             | 0.216 | 0.211 | 46.9 | 96 |
| Latent norm        | 0.516            | 0.611 | 0.618 | 383 | 98 | 0.321             | 0.212 | 0.230 | 45.2 | 97 | 0.358             | 0.209 | 0.208 | 44.3 | 96 |

Web Table 5: Results from 1000 simulated datasets of  $N = 100$  cases and  $M = 1$  control per case with MCAR missingness mechanism. ‘LOR’ is mean estimated log odds ratio, ‘SE’ is empirical standard error, ‘estSE’ is mean estimated standard error, ‘MSE’ is mean squared error  $\times 1000$ , and ‘cv’ is coverage of 95% confidence interval. True log odds ratios are 0.417, 0.333 and 0.333 for  $X^{\text{cat}}$ ,  $X^{\text{conA}}$  and  $X^{\text{conB}}$ , respectively. The complete-case analysis failed in 4 simulated datasets when 10% missing data, and in 67 datasets when 25% missing data. MI methods failed in no datasets when 10% missing data, and in at most 5 when 25% missing data. When calculating LOR, SE, estSE, MSE and cv for a method, datasets for which that method failed were excluded.

|                    | $X^{\text{cat}}$ |       |       |     |    | $X^{\text{conA}}$ |       |       |      |    | $X^{\text{conB}}$ |       |       |      |    |
|--------------------|------------------|-------|-------|-----|----|-------------------|-------|-------|------|----|-------------------|-------|-------|------|----|
|                    | LOR              | SE    | estSE | MSE | cv | LOR               | SE    | estSE | MSE  | cv | LOR               | SE    | estSE | MSE  | cv |
| Complete data      | 0.454            | 0.489 | 0.488 | 240 | 97 | 0.351             | 0.194 | 0.191 | 38   | 95 | 0.353             | 0.196 | 0.191 | 38.8 | 96 |
| <b>10% missing</b> |                  |       |       |     |    |                   |       |       |      |    |                   |       |       |      |    |
| Complete cases     | 0.458            | 0.655 | 0.647 | 431 | 97 | 0.360             | 0.250 | 0.240 | 63.5 | 96 | 0.351             | 0.256 | 0.241 | 65.9 | 95 |
| Match var: FCS     | 0.461            | 0.523 | 0.530 | 275 | 97 | 0.357             | 0.205 | 0.204 | 42.6 | 96 | 0.351             | 0.199 | 0.195 | 39.9 | 96 |
| Normal             | 0.435            | 0.495 | 0.526 | 246 | 98 | 0.358             | 0.205 | 0.204 | 42.6 | 96 | 0.353             | 0.199 | 0.195 | 39.9 | 96 |
| Latent norm        | 0.467            | 0.521 | 0.530 | 274 | 97 | 0.351             | 0.201 | 0.204 | 40.5 | 96 | 0.354             | 0.198 | 0.195 | 39.8 | 96 |
| Match set: FCS     | 0.464            | 0.531 | 0.534 | 284 | 97 | 0.354             | 0.207 | 0.205 | 43.4 | 95 | 0.355             | 0.200 | 0.195 | 40.5 | 96 |
| Normal             | 0.459            | 0.521 | 0.548 | 274 | 97 | 0.365             | 0.215 | 0.210 | 47.2 | 96 | 0.348             | 0.202 | 0.197 | 41.1 | 96 |
| Latent norm        | 0.481            | 0.540 | 0.541 | 296 | 96 | 0.341             | 0.200 | 0.206 | 39.9 | 96 | 0.354             | 0.200 | 0.197 | 40.6 | 96 |
| <b>25% missing</b> |                  |       |       |     |    |                   |       |       |      |    |                   |       |       |      |    |
| Complete cases     | 0.317            | 0.973 | 0.997 | 957 | 98 | 0.408             | 0.422 | 0.366 | 184  | 96 | 0.369             | 0.422 | 0.367 | 179  | 97 |
| Match var: FCS     | 0.468            | 0.603 | 0.605 | 366 | 97 | 0.359             | 0.224 | 0.228 | 50.8 | 96 | 0.353             | 0.205 | 0.203 | 42.5 | 96 |
| Normal             | 0.409            | 0.534 | 0.584 | 285 | 98 | 0.360             | 0.222 | 0.226 | 49.8 | 97 | 0.358             | 0.204 | 0.202 | 42.1 | 96 |
| Latent norm        | 0.487            | 0.595 | 0.600 | 359 | 97 | 0.342             | 0.207 | 0.225 | 43   | 97 | 0.360             | 0.202 | 0.203 | 41.4 | 97 |
| Match set: FCS     | 0.458            | 0.603 | 0.630 | 366 | 98 | 0.357             | 0.236 | 0.235 | 56.3 | 96 | 0.361             | 0.211 | 0.206 | 45.2 | 96 |
| Normal             | 0.454            | 0.572 | 0.647 | 329 | 99 | 0.387             | 0.254 | 0.247 | 67.1 | 95 | 0.342             | 0.215 | 0.210 | 46.2 | 96 |
| Latent norm        | 0.517            | 0.649 | 0.643 | 431 | 98 | 0.321             | 0.209 | 0.230 | 43.7 | 97 | 0.359             | 0.208 | 0.208 | 44   | 96 |

Web Table 6: Results from 1000 simulated datasets of  $N = 100$  cases and  $M = 1$  control per case with MAR-A missingness mechanism. ‘LOR’ is mean estimated log odds ratio, ‘SE’ is empirical standard error, ‘estSE’ is mean estimated standard error, ‘MSE’ is mean squared error  $\times 1000$ , and ‘cv’ is coverage of 95% confidence interval. True log odds ratios are 0.417, 0.333 and 0.333 for  $X^{\text{cat}}$ ,  $X^{\text{conA}}$  and  $X^{\text{conB}}$ , respectively. The complete-case analysis failed in 5 simulated datasets when 10% missing data, and in 82 datasets when 25% missing data. MI methods failed in no datasets when 10% missing data, and in at most 6 when 25% missing data. When calculating LOR, SE, estSE, MSE and cv for a method, datasets for which that method failed were excluded.



|                    | $X^{\text{cat}}$ |       |       |     |    | $X^{\text{conA}}$ |       |       |      |    | $X^{\text{conB}}$ |       |       |      |    |
|--------------------|------------------|-------|-------|-----|----|-------------------|-------|-------|------|----|-------------------|-------|-------|------|----|
|                    | LOR              | SE    | estSE | MSE | cv | LOR               | SE    | estSE | MSE  | cv | LOR               | SE    | estSE | MSE  | cv |
| Complete data      | 0.454            | 0.489 | 0.488 | 240 | 97 | 0.351             | 0.194 | 0.191 | 38   | 95 | 0.353             | 0.196 | 0.191 | 38.8 | 96 |
| <b>10% missing</b> |                  |       |       |     |    |                   |       |       |      |    |                   |       |       |      |    |
| Complete cases     | 0.444            | 0.655 | 0.641 | 430 | 97 | 0.360             | 0.249 | 0.236 | 63   | 96 | 0.291             | 0.257 | 0.236 | 67.7 | 95 |
| Match var: FCS     | 0.458            | 0.521 | 0.528 | 273 | 97 | 0.355             | 0.206 | 0.203 | 43.1 | 96 | 0.352             | 0.200 | 0.195 | 40.3 | 96 |
| Normal             | 0.422            | 0.499 | 0.524 | 249 | 98 | 0.356             | 0.205 | 0.203 | 42.5 | 96 | 0.355             | 0.199 | 0.194 | 40.3 | 96 |
| Latent norm        | 0.464            | 0.520 | 0.528 | 273 | 97 | 0.350             | 0.200 | 0.203 | 40.5 | 96 | 0.354             | 0.199 | 0.195 | 39.9 | 97 |
| Match set: FCS     | 0.465            | 0.528 | 0.533 | 281 | 97 | 0.351             | 0.208 | 0.205 | 43.7 | 95 | 0.356             | 0.201 | 0.195 | 40.9 | 96 |
| Normal             | 0.453            | 0.518 | 0.547 | 269 | 97 | 0.360             | 0.215 | 0.209 | 47.1 | 95 | 0.351             | 0.202 | 0.197 | 41.3 | 96 |
| Latent norm        | 0.475            | 0.536 | 0.540 | 291 | 97 | 0.338             | 0.199 | 0.205 | 39.6 | 96 | 0.355             | 0.201 | 0.196 | 40.9 | 96 |
| <b>25% missing</b> |                  |       |       |     |    |                   |       |       |      |    |                   |       |       |      |    |
| Complete cases     | 0.326            | 0.958 | 0.978 | 927 | 98 | 0.403             | 0.407 | 0.351 | 170  | 96 | 0.239             | 0.406 | 0.350 | 174  | 93 |
| Match var: FCS     | 0.465            | 0.589 | 0.604 | 349 | 97 | 0.360             | 0.227 | 0.227 | 52   | 96 | 0.350             | 0.208 | 0.203 | 43.4 | 96 |
| Normal             | 0.379            | 0.529 | 0.583 | 282 | 98 | 0.361             | 0.223 | 0.225 | 50.7 | 96 | 0.357             | 0.205 | 0.202 | 42.7 | 96 |
| Latent norm        | 0.479            | 0.591 | 0.599 | 353 | 98 | 0.342             | 0.210 | 0.224 | 44.4 | 97 | 0.359             | 0.204 | 0.203 | 42.2 | 96 |
| Match set: FCS     | 0.481            | 0.617 | 0.633 | 385 | 98 | 0.354             | 0.242 | 0.235 | 59.1 | 96 | 0.358             | 0.214 | 0.207 | 46.3 | 96 |
| Normal             | 0.452            | 0.579 | 0.647 | 336 | 98 | 0.380             | 0.256 | 0.245 | 67.9 | 95 | 0.345             | 0.217 | 0.209 | 47.3 | 96 |
| Latent norm        | 0.513            | 0.651 | 0.643 | 433 | 98 | 0.320             | 0.211 | 0.228 | 44.7 | 97 | 0.358             | 0.211 | 0.208 | 45   | 96 |

Web Table 7: Results from 1000 simulated datasets of  $N = 100$  cases and  $M = 1$  control per case with MAR-B missingness mechanism. ‘LOR’ is mean estimated log odds ratio, ‘SE’ is empirical standard error, ‘estSE’ is mean estimated standard error, ‘MSE’ is mean squared error  $\times 1000$ , and ‘cv’ is coverage of 95% confidence interval. True log odds ratios are 0.417, 0.333 and 0.333 for  $X^{\text{cat}}$ ,  $X^{\text{conA}}$  and  $X^{\text{conB}}$ , respectively. The complete-case analysis failed in 6 simulated datasets when 10% missing data, and in 88 datasets when 25% missing data. MI methods failed in at most one dataset when 10% missing data, and in at most 7 when 25% missing data. When calculating LOR, SE, estSE, MSE and cv for a method, datasets for which that method failed were excluded.

|                    | $X^{\text{cat}}$ |       |       |     |    | $X^{\text{conA}}$ |       |       |      |    | $X^{\text{conB}}$ |       |       |      |    |
|--------------------|------------------|-------|-------|-----|----|-------------------|-------|-------|------|----|-------------------|-------|-------|------|----|
|                    | LOR              | SE    | estSE | MSE | cv | LOR               | SE    | estSE | MSE  | cv | LOR               | SE    | estSE | MSE  | cv |
| Complete data      | 0.402            | 0.334 | 0.330 | 112 | 95 | 0.336             | 0.143 | 0.138 | 20.4 | 94 | 0.339             | 0.135 | 0.138 | 18.4 | 96 |
| <b>10% missing</b> |                  |       |       |     |    |                   |       |       |      |    |                   |       |       |      |    |
| Complete cases     | 0.408            | 0.387 | 0.388 | 150 | 96 | 0.340             | 0.165 | 0.160 | 27.3 | 95 | 0.341             | 0.161 | 0.160 | 26   | 96 |
| Match var: FCS     | 0.400            | 0.349 | 0.350 | 122 | 95 | 0.336             | 0.147 | 0.146 | 21.7 | 96 | 0.339             | 0.137 | 0.140 | 18.7 | 96 |
| Normal             | 0.391            | 0.340 | 0.349 | 116 | 97 | 0.338             | 0.147 | 0.146 | 21.7 | 96 | 0.340             | 0.136 | 0.140 | 18.6 | 96 |
| Latent norm        | 0.406            | 0.349 | 0.350 | 122 | 96 | 0.332             | 0.145 | 0.146 | 20.9 | 96 | 0.341             | 0.136 | 0.140 | 18.5 | 96 |
| Match set: FCS     | 0.390            | 0.347 | 0.349 | 121 | 96 | 0.332             | 0.145 | 0.146 | 21.1 | 96 | 0.342             | 0.136 | 0.140 | 18.5 | 96 |
| Normal             | 0.395            | 0.345 | 0.353 | 119 | 96 | 0.340             | 0.148 | 0.147 | 22   | 96 | 0.339             | 0.137 | 0.141 | 18.8 | 96 |
| Latent norm        | 0.408            | 0.352 | 0.352 | 124 | 95 | 0.325             | 0.144 | 0.146 | 20.9 | 96 | 0.341             | 0.138 | 0.141 | 19   | 96 |
| <b>25% missing</b> |                  |       |       |     |    |                   |       |       |      |    |                   |       |       |      |    |
| Complete cases     | 0.437            | 0.564 | 0.533 | 318 | 95 | 0.353             | 0.219 | 0.216 | 48.3 | 96 | 0.348             | 0.219 | 0.216 | 48.1 | 96 |
| Match var: FCS     | 0.405            | 0.388 | 0.388 | 151 | 96 | 0.337             | 0.161 | 0.162 | 26   | 96 | 0.339             | 0.139 | 0.145 | 19.3 | 96 |
| Normal             | 0.380            | 0.360 | 0.379 | 131 | 97 | 0.341             | 0.160 | 0.161 | 25.7 | 96 | 0.342             | 0.138 | 0.144 | 19.2 | 96 |
| Latent norm        | 0.421            | 0.388 | 0.387 | 150 | 96 | 0.324             | 0.153 | 0.160 | 23.5 | 97 | 0.345             | 0.137 | 0.145 | 19   | 96 |
| Match set: FCS     | 0.375            | 0.375 | 0.386 | 142 | 96 | 0.325             | 0.156 | 0.160 | 24.4 | 97 | 0.349             | 0.138 | 0.144 | 19.2 | 96 |
| Normal             | 0.392            | 0.372 | 0.393 | 139 | 96 | 0.347             | 0.168 | 0.166 | 28.4 | 95 | 0.337             | 0.142 | 0.146 | 20.1 | 95 |
| Latent norm        | 0.429            | 0.400 | 0.395 | 161 | 96 | 0.308             | 0.154 | 0.162 | 24.3 | 96 | 0.344             | 0.142 | 0.147 | 20.2 | 96 |

Web Table 8: Results from 1000 simulated datasets of  $N = 100$  cases and  $M = 4$  controls per case with MCAR missingness mechanism. ‘LOR’ is mean estimated log odds ratio, ‘SE’ is empirical standard error, ‘estSE’ is mean estimated standard error, ‘MSE’ is mean squared error  $\times 1000$ , and ‘cv’ is coverage of 95% confidence interval. True log odds ratios are 0.417, 0.333 and 0.333 for  $X^{\text{cat}}$ ,  $X^{\text{conA}}$  and  $X^{\text{conB}}$ , respectively.

|                    | $X^{\text{cat}}$ |       |       |     |    | $X^{\text{conA}}$ |       |       |      |    | $X^{\text{conB}}$ |       |       |      |    |
|--------------------|------------------|-------|-------|-----|----|-------------------|-------|-------|------|----|-------------------|-------|-------|------|----|
|                    | LOR              | SE    | estSE | MSE | cv | LOR               | SE    | estSE | MSE  | cv | LOR               | SE    | estSE | MSE  | cv |
| Complete data      | 0.402            | 0.334 | 0.330 | 112 | 95 | 0.336             | 0.143 | 0.138 | 20.4 | 94 | 0.339             | 0.135 | 0.138 | 18.4 | 96 |
| <b>10% missing</b> |                  |       |       |     |    |                   |       |       |      |    |                   |       |       |      |    |
| Complete cases     | 0.406            | 0.407 | 0.402 | 166 | 95 | 0.341             | 0.168 | 0.162 | 28.1 | 95 | 0.329             | 0.159 | 0.162 | 25.5 | 96 |
| Match var: FCS     | 0.402            | 0.357 | 0.356 | 127 | 96 | 0.338             | 0.149 | 0.147 | 22.3 | 96 | 0.339             | 0.136 | 0.141 | 18.6 | 96 |
| Normal             | 0.385            | 0.347 | 0.354 | 122 | 96 | 0.339             | 0.149 | 0.147 | 22.3 | 96 | 0.340             | 0.136 | 0.140 | 18.6 | 95 |
| Latent norm        | 0.406            | 0.357 | 0.356 | 128 | 96 | 0.333             | 0.147 | 0.147 | 21.5 | 96 | 0.341             | 0.136 | 0.141 | 18.5 | 96 |
| Match set: FCS     | 0.396            | 0.351 | 0.355 | 124 | 96 | 0.332             | 0.148 | 0.147 | 21.8 | 96 | 0.342             | 0.136 | 0.141 | 18.5 | 96 |
| Normal             | 0.395            | 0.349 | 0.359 | 122 | 96 | 0.340             | 0.150 | 0.148 | 22.6 | 96 | 0.340             | 0.136 | 0.141 | 18.6 | 96 |
| Latent norm        | 0.407            | 0.358 | 0.358 | 129 | 96 | 0.325             | 0.146 | 0.147 | 21.4 | 96 | 0.342             | 0.137 | 0.141 | 18.8 | 96 |
| <b>25% missing</b> |                  |       |       |     |    |                   |       |       |      |    |                   |       |       |      |    |
| Complete cases     | 0.436            | 0.616 | 0.577 | 380 | 95 | 0.353             | 0.218 | 0.215 | 47.8 | 96 | 0.331             | 0.220 | 0.217 | 48.5 | 96 |
| Match var: FCS     | 0.399            | 0.405 | 0.405 | 165 | 95 | 0.338             | 0.161 | 0.163 | 26   | 96 | 0.338             | 0.140 | 0.146 | 19.7 | 96 |
| Normal             | 0.359            | 0.369 | 0.393 | 140 | 96 | 0.341             | 0.160 | 0.163 | 25.6 | 96 | 0.343             | 0.139 | 0.145 | 19.4 | 96 |
| Latent norm        | 0.412            | 0.401 | 0.401 | 161 | 95 | 0.325             | 0.153 | 0.161 | 23.4 | 97 | 0.345             | 0.138 | 0.146 | 19.3 | 96 |
| Match set: FCS     | 0.378            | 0.390 | 0.403 | 153 | 97 | 0.321             | 0.155 | 0.163 | 24.2 | 97 | 0.349             | 0.139 | 0.146 | 19.6 | 96 |
| Normal             | 0.385            | 0.384 | 0.409 | 149 | 97 | 0.345             | 0.167 | 0.167 | 28   | 96 | 0.339             | 0.142 | 0.147 | 20.3 | 96 |
| Latent norm        | 0.417            | 0.417 | 0.411 | 174 | 95 | 0.306             | 0.153 | 0.163 | 24.2 | 96 | 0.346             | 0.142 | 0.148 | 20.4 | 96 |

Web Table 9: Results from 1000 simulated datasets of  $N = 100$  cases and  $M = 4$  controls per case with MAR-A missingness mechanism. ‘LOR’ is mean estimated log odds ratio, ‘SE’ is empirical standard error, ‘estSE’ is mean estimated standard error, ‘MSE’ is mean squared error  $\times 1000$ , and ‘cv’ is coverage of 95% confidence interval. True log odds ratios are 0.417, 0.333 and 0.333 for  $X^{\text{cat}}$ ,  $X^{\text{conA}}$  and  $X^{\text{conB}}$ , respectively.

|                    | $X^{\text{cat}}$ |       |       |     |    | $X^{\text{conA}}$ |       |       |      |    | $X^{\text{conB}}$ |       |       |      |    |
|--------------------|------------------|-------|-------|-----|----|-------------------|-------|-------|------|----|-------------------|-------|-------|------|----|
|                    | LOR              | SE    | estSE | MSE | cv | LOR               | SE    | estSE | MSE  | cv | LOR               | SE    | estSE | MSE  | cv |
| Complete data      | 0.402            | 0.334 | 0.330 | 112 | 95 | 0.336             | 0.143 | 0.138 | 20.4 | 94 | 0.339             | 0.135 | 0.138 | 18.4 | 96 |
| <b>10% missing</b> |                  |       |       |     |    |                   |       |       |      |    |                   |       |       |      |    |
| Complete cases     | 0.395            | 0.420 | 0.406 | 177 | 95 | 0.341             | 0.167 | 0.161 | 28   | 94 | 0.265             | 0.158 | 0.162 | 29.6 | 93 |
| Match var: FCS     | 0.398            | 0.364 | 0.358 | 133 | 95 | 0.338             | 0.150 | 0.147 | 22.6 | 96 | 0.338             | 0.136 | 0.141 | 18.6 | 95 |
| Normal             | 0.363            | 0.352 | 0.356 | 127 | 96 | 0.340             | 0.149 | 0.147 | 22.4 | 96 | 0.341             | 0.136 | 0.141 | 18.5 | 95 |
| Latent norm        | 0.401            | 0.362 | 0.357 | 132 | 96 | 0.333             | 0.148 | 0.147 | 21.9 | 96 | 0.341             | 0.136 | 0.141 | 18.5 | 96 |
| Match set: FCS     | 0.396            | 0.360 | 0.357 | 130 | 96 | 0.331             | 0.149 | 0.147 | 22.1 | 96 | 0.342             | 0.136 | 0.141 | 18.6 | 96 |
| Normal             | 0.378            | 0.354 | 0.361 | 127 | 96 | 0.338             | 0.151 | 0.148 | 22.9 | 96 | 0.341             | 0.136 | 0.141 | 18.7 | 96 |
| Latent norm        | 0.399            | 0.368 | 0.360 | 135 | 95 | 0.325             | 0.147 | 0.148 | 21.6 | 96 | 0.342             | 0.137 | 0.142 | 18.8 | 96 |
| <b>25% missing</b> |                  |       |       |     |    |                   |       |       |      |    |                   |       |       |      |    |
| Complete cases     | 0.403            | 0.624 | 0.583 | 390 | 95 | 0.354             | 0.216 | 0.212 | 47.3 | 96 | 0.193             | 0.216 | 0.213 | 66.3 | 89 |
| Match var: FCS     | 0.391            | 0.411 | 0.411 | 169 | 96 | 0.340             | 0.162 | 0.164 | 26.3 | 96 | 0.336             | 0.142 | 0.146 | 20.1 | 96 |
| Normal             | 0.317            | 0.373 | 0.398 | 149 | 96 | 0.344             | 0.162 | 0.163 | 26.3 | 96 | 0.343             | 0.141 | 0.145 | 20   | 95 |
| Latent norm        | 0.398            | 0.406 | 0.408 | 165 | 96 | 0.327             | 0.154 | 0.163 | 23.9 | 97 | 0.343             | 0.140 | 0.146 | 19.7 | 96 |
| Match set: FCS     | 0.386            | 0.396 | 0.411 | 158 | 96 | 0.322             | 0.157 | 0.166 | 24.6 | 96 | 0.346             | 0.141 | 0.147 | 20.1 | 96 |
| Normal             | 0.355            | 0.384 | 0.413 | 151 | 97 | 0.343             | 0.167 | 0.167 | 28.1 | 95 | 0.342             | 0.144 | 0.147 | 20.7 | 96 |
| Latent norm        | 0.399            | 0.421 | 0.418 | 177 | 96 | 0.307             | 0.155 | 0.164 | 24.8 | 96 | 0.346             | 0.144 | 0.149 | 20.9 | 95 |

Web Table 10: Results from 1000 simulated datasets of  $N = 100$  cases and  $M = 4$  controls per case with MAR-B missingness mechanism. ‘LOR’ is mean estimated log odds ratio, ‘SE’ is empirical standard error, ‘estSE’ is mean estimated standard error, ‘MSE’ is mean squared error  $\times 1000$ , and ‘cv’ is coverage of 95% confidence interval. True log odds ratios are 0.417, 0.333 and 0.333 for  $X^{\text{cat}}$ ,  $X^{\text{conA}}$  and  $X^{\text{conB}}$ , respectively.

|                    | $X^{\text{cat}}$ |       |       |      |    | $X^{\text{conA}}$ |       |       |      |    | $X^{\text{conB}}$ |       |       |      |    |
|--------------------|------------------|-------|-------|------|----|-------------------|-------|-------|------|----|-------------------|-------|-------|------|----|
|                    | LOR              | SE    | estSE | MSE  | cv | LOR               | SE    | estSE | MSE  | cv | LOR               | SE    | estSE | MSE  | cv |
| <b>10% missing</b> |                  |       |       |      |    |                   |       |       |      |    |                   |       |       |      |    |
| Complete data      | 0.426            | 0.213 | 0.206 | 45.3 | 94 | 0.336             | 0.078 | 0.082 | 6.15 | 96 | 0.337             | 0.083 | 0.082 | 6.88 | 95 |
| Complete cases     | 0.431            | 0.264 | 0.256 | 70   | 96 | 0.337             | 0.100 | 0.102 | 10.1 | 96 | 0.340             | 0.103 | 0.102 | 10.6 | 96 |
| Match var: FCS     | 0.432            | 0.223 | 0.219 | 50.1 | 95 | 0.332             | 0.083 | 0.087 | 6.9  | 96 | 0.338             | 0.085 | 0.084 | 7.2  | 94 |
| Normal             | 0.412            | 0.214 | 0.218 | 45.6 | 96 | 0.333             | 0.083 | 0.087 | 6.82 | 96 | 0.340             | 0.085 | 0.084 | 7.2  | 95 |
| Latent norm        | 0.437            | 0.222 | 0.218 | 49.6 | 96 | 0.327             | 0.081 | 0.087 | 6.64 | 96 | 0.340             | 0.084 | 0.084 | 7.17 | 95 |
| Match set: FCS     | 0.429            | 0.226 | 0.219 | 51.1 | 95 | 0.334             | 0.084 | 0.088 | 7.09 | 96 | 0.338             | 0.085 | 0.084 | 7.23 | 94 |
| Normal             | 0.422            | 0.222 | 0.223 | 49.2 | 96 | 0.340             | 0.086 | 0.089 | 7.49 | 96 | 0.335             | 0.086 | 0.084 | 7.35 | 95 |
| Latent norm        | 0.445            | 0.225 | 0.220 | 51.3 | 95 | 0.311             | 0.081 | 0.087 | 7.01 | 95 | 0.342             | 0.086 | 0.084 | 7.44 | 95 |
| <b>25% missing</b> |                  |       |       |      |    |                   |       |       |      |    |                   |       |       |      |    |
| Complete data      | 0.426            | 0.213 | 0.206 | 45.3 | 94 | 0.336             | 0.078 | 0.082 | 6.15 | 96 | 0.337             | 0.083 | 0.082 | 6.88 | 95 |
| Complete cases     | 0.449            | 0.379 | 0.377 | 145  | 96 | 0.341             | 0.144 | 0.149 | 20.8 | 97 | 0.342             | 0.150 | 0.149 | 22.4 | 96 |
| Match var: FCS     | 0.439            | 0.239 | 0.241 | 57.8 | 96 | 0.328             | 0.089 | 0.095 | 7.98 | 96 | 0.339             | 0.087 | 0.086 | 7.59 | 95 |
| Normal             | 0.390            | 0.215 | 0.235 | 46.8 | 97 | 0.330             | 0.089 | 0.095 | 7.93 | 97 | 0.342             | 0.087 | 0.086 | 7.58 | 95 |
| Latent norm        | 0.451            | 0.238 | 0.240 | 58   | 96 | 0.316             | 0.084 | 0.095 | 7.45 | 96 | 0.345             | 0.086 | 0.086 | 7.5  | 95 |
| Match set: FCS     | 0.430            | 0.247 | 0.243 | 61.3 | 95 | 0.335             | 0.094 | 0.098 | 8.87 | 96 | 0.339             | 0.088 | 0.087 | 7.71 | 95 |
| Normal             | 0.413            | 0.239 | 0.251 | 57   | 97 | 0.351             | 0.099 | 0.102 | 10.1 | 95 | 0.329             | 0.090 | 0.088 | 8.12 | 94 |
| Latent norm        | 0.476            | 0.249 | 0.246 | 65.7 | 95 | 0.279             | 0.084 | 0.095 | 9.98 | 93 | 0.348             | 0.090 | 0.089 | 8.3  | 95 |

Web Table 11: Results from 1000 simulated datasets of  $N = 500$  cases and  $M = 1$  control per case with MCAR missingness mechanism in Sensitivity Analysis 1 (where there is an interaction between  $S_{\text{cat}}$  and  $S_{\text{con}}$ ). ‘LOR’ is mean estimated log odds ratio, ‘SE’ is empirical standard error, ‘estSE’ is mean estimated standard error, ‘MSE’ is mean squared error  $\times 1000$ , and ‘cv’ is coverage of 95% confidence interval. True log odds ratios are 0.417, 0.333 and 0.333 for  $X^{\text{cat}}$ ,  $X^{\text{conA}}$  and  $X^{\text{conB}}$ , respectively.

|                    | $X^{\text{cat}}$ |       |       |      |    | $X^{\text{conA}}$ |       |       |      |    | $X^{\text{conB}}$ |       |       |      |    |
|--------------------|------------------|-------|-------|------|----|-------------------|-------|-------|------|----|-------------------|-------|-------|------|----|
|                    | LOR              | SE    | estSE | MSE  | cv | LOR               | SE    | estSE | MSE  | cv | LOR               | SE    | estSE | MSE  | cv |
| <b>10% missing</b> |                  |       |       |      |    |                   |       |       |      |    |                   |       |       |      |    |
| Complete data      | 0.426            | 0.213 | 0.206 | 45.3 | 94 | 0.336             | 0.078 | 0.082 | 6.15 | 96 | 0.337             | 0.083 | 0.082 | 6.88 | 95 |
| Complete cases     | 0.432            | 0.275 | 0.264 | 76.1 | 95 | 0.338             | 0.097 | 0.101 | 9.42 | 96 | 0.328             | 0.102 | 0.101 | 10.5 | 95 |
| Match var: FCS     | 0.434            | 0.222 | 0.221 | 49.5 | 95 | 0.332             | 0.081 | 0.087 | 6.6  | 96 | 0.338             | 0.084 | 0.084 | 7.13 | 94 |
| Normal             | 0.408            | 0.212 | 0.220 | 45.1 | 96 | 0.334             | 0.081 | 0.087 | 6.64 | 96 | 0.340             | 0.084 | 0.084 | 7.12 | 95 |
| Latent norm        | 0.438            | 0.220 | 0.221 | 48.9 | 96 | 0.328             | 0.080 | 0.087 | 6.45 | 96 | 0.340             | 0.084 | 0.084 | 7.1  | 95 |
| Match set: FCS     | 0.431            | 0.227 | 0.222 | 51.7 | 95 | 0.334             | 0.083 | 0.088 | 6.85 | 96 | 0.339             | 0.084 | 0.084 | 7.15 | 95 |
| Normal             | 0.424            | 0.222 | 0.226 | 49.5 | 95 | 0.339             | 0.084 | 0.089 | 7.17 | 96 | 0.336             | 0.085 | 0.084 | 7.24 | 94 |
| Latent norm        | 0.448            | 0.225 | 0.223 | 51.8 | 95 | 0.310             | 0.079 | 0.087 | 6.82 | 96 | 0.343             | 0.085 | 0.084 | 7.34 | 95 |
| <b>25% missing</b> |                  |       |       |      |    |                   |       |       |      |    |                   |       |       |      |    |
| Complete data      | 0.426            | 0.213 | 0.206 | 45.3 | 94 | 0.336             | 0.078 | 0.082 | 6.15 | 96 | 0.337             | 0.083 | 0.082 | 6.88 | 95 |
| Complete cases     | 0.457            | 0.408 | 0.397 | 168  | 96 | 0.339             | 0.140 | 0.141 | 19.7 | 96 | 0.321             | 0.147 | 0.143 | 21.6 | 94 |
| Match var: FCS     | 0.437            | 0.244 | 0.248 | 59.8 | 96 | 0.328             | 0.089 | 0.095 | 8.02 | 96 | 0.339             | 0.088 | 0.086 | 7.7  | 95 |
| Normal             | 0.377            | 0.217 | 0.240 | 48.7 | 97 | 0.331             | 0.089 | 0.095 | 7.9  | 97 | 0.344             | 0.087 | 0.086 | 7.71 | 95 |
| Latent norm        | 0.448            | 0.241 | 0.246 | 58.9 | 96 | 0.316             | 0.085 | 0.094 | 7.54 | 96 | 0.345             | 0.087 | 0.086 | 7.64 | 95 |
| Match set: FCS     | 0.430            | 0.256 | 0.253 | 65.5 | 96 | 0.330             | 0.094 | 0.098 | 8.92 | 96 | 0.342             | 0.089 | 0.087 | 7.93 | 95 |
| Normal             | 0.410            | 0.242 | 0.260 | 58.7 | 97 | 0.347             | 0.100 | 0.101 | 10.1 | 96 | 0.333             | 0.091 | 0.088 | 8.24 | 94 |
| Latent norm        | 0.471            | 0.255 | 0.254 | 68.1 | 94 | 0.277             | 0.085 | 0.095 | 10.3 | 93 | 0.351             | 0.090 | 0.088 | 8.47 | 94 |

Web Table 12: Results from 1000 simulated datasets of  $N = 500$  cases and  $M = 1$  control per case with MAR-A missingness mechanism in Sensitivity Analysis 1 (where there is an interaction between  $S_{\text{cat}}$  and  $S_{\text{con}}$ ). ‘LOR’ is mean estimated log odds ratio, ‘SE’ is empirical standard error, ‘estSE’ is mean estimated standard error, ‘MSE’ is mean squared error  $\times 1000$ , and ‘cv’ is coverage of 95% confidence interval. True log odds ratios are 0.417, 0.333 and 0.333 for  $X^{\text{cat}}$ ,  $X^{\text{conA}}$  and  $X^{\text{conB}}$ , respectively.

|                    | $X^{\text{cat}}$ |       |       |      |    | $X^{\text{conA}}$ |       |       |      |    | $X^{\text{conB}}$ |       |       |      |    |
|--------------------|------------------|-------|-------|------|----|-------------------|-------|-------|------|----|-------------------|-------|-------|------|----|
|                    | LOR              | SE    | estSE | MSE  | cv | LOR               | SE    | estSE | MSE  | cv | LOR               | SE    | estSE | MSE  | cv |
| <b>10% missing</b> |                  |       |       |      |    |                   |       |       |      |    |                   |       |       |      |    |
| Complete data      | 0.426            | 0.213 | 0.206 | 45.3 | 94 | 0.336             | 0.078 | 0.082 | 6.15 | 96 | 0.337             | 0.083 | 0.082 | 6.88 | 95 |
| Complete cases     | 0.427            | 0.272 | 0.262 | 73.9 | 94 | 0.336             | 0.096 | 0.099 | 9.16 | 97 | 0.272             | 0.101 | 0.099 | 13.9 | 88 |
| Match var: FCS     | 0.435            | 0.220 | 0.221 | 48.8 | 95 | 0.331             | 0.082 | 0.087 | 6.68 | 97 | 0.338             | 0.085 | 0.084 | 7.2  | 95 |
| Normal             | 0.394            | 0.211 | 0.219 | 45.1 | 96 | 0.333             | 0.082 | 0.087 | 6.7  | 97 | 0.342             | 0.084 | 0.084 | 7.17 | 95 |
| Latent norm        | 0.439            | 0.218 | 0.220 | 48.2 | 96 | 0.326             | 0.080 | 0.087 | 6.51 | 97 | 0.341             | 0.084 | 0.084 | 7.18 | 95 |
| Match set: FCS     | 0.434            | 0.225 | 0.222 | 50.8 | 94 | 0.330             | 0.083 | 0.087 | 6.94 | 96 | 0.340             | 0.085 | 0.084 | 7.27 | 94 |
| Normal             | 0.414            | 0.222 | 0.226 | 49.2 | 96 | 0.336             | 0.085 | 0.088 | 7.26 | 96 | 0.338             | 0.085 | 0.084 | 7.31 | 94 |
| Latent norm        | 0.448            | 0.222 | 0.223 | 50.2 | 95 | 0.307             | 0.080 | 0.087 | 7.07 | 95 | 0.345             | 0.086 | 0.084 | 7.49 | 94 |
| <b>25% missing</b> |                  |       |       |      |    |                   |       |       |      |    |                   |       |       |      |    |
| Complete data      | 0.426            | 0.213 | 0.206 | 45.3 | 94 | 0.336             | 0.078 | 0.082 | 6.15 | 96 | 0.337             | 0.083 | 0.082 | 6.88 | 95 |
| Complete cases     | 0.428            | 0.318 | 0.302 | 101  | 95 | 0.339             | 0.109 | 0.111 | 11.9 | 96 | 0.244             | 0.114 | 0.111 | 21.1 | 86 |
| Match var: FCS     | 0.438            | 0.228 | 0.230 | 52.4 | 96 | 0.329             | 0.085 | 0.089 | 7.16 | 96 | 0.339             | 0.086 | 0.085 | 7.39 | 95 |
| Normal             | 0.375            | 0.212 | 0.227 | 46.7 | 96 | 0.333             | 0.084 | 0.089 | 7.06 | 97 | 0.343             | 0.085 | 0.084 | 7.37 | 95 |
| Latent norm        | 0.442            | 0.226 | 0.230 | 51.6 | 97 | 0.322             | 0.082 | 0.089 | 6.82 | 97 | 0.343             | 0.085 | 0.085 | 7.33 | 95 |
| Match set: FCS     | 0.435            | 0.236 | 0.233 | 56.1 | 95 | 0.329             | 0.087 | 0.091 | 7.65 | 96 | 0.341             | 0.087 | 0.085 | 7.55 | 95 |
| Normal             | 0.407            | 0.229 | 0.239 | 52.4 | 96 | 0.339             | 0.090 | 0.092 | 8.1  | 96 | 0.338             | 0.088 | 0.085 | 7.68 | 95 |
| Latent norm        | 0.458            | 0.233 | 0.234 | 56.1 | 95 | 0.293             | 0.081 | 0.089 | 8.2  | 94 | 0.349             | 0.087 | 0.086 | 7.85 | 95 |

Web Table 13: Results from 1000 simulated datasets of  $N = 500$  cases and  $M = 1$  control per case with MAR-B missingness mechanism in Sensitivity Analysis 1 (where there is an interaction between  $S_{\text{cat}}$  and  $S_{\text{con}}$ ). ‘LOR’ is mean estimated log odds ratio, ‘SE’ is empirical standard error, ‘estSE’ is mean estimated standard error, ‘MSE’ is mean squared error  $\times 1000$ , and ‘cv’ is coverage of 95% confidence interval. True log odds ratios are 0.417, 0.333 and 0.333 for  $X^{\text{cat}}$ ,  $X^{\text{conA}}$  and  $X^{\text{conB}}$ , respectively.

|                    | $X^{\text{cat}}$ |       |       |      |    | $X^{\text{conA}}$ |       |       |      |    | $X^{\text{conB}}$ |       |       |      |    |
|--------------------|------------------|-------|-------|------|----|-------------------|-------|-------|------|----|-------------------|-------|-------|------|----|
|                    | LOR              | eSE   | estSE | MSE  | cv | LOR               | eSE   | estSE | MSE  | cv | LOR               | eSE   | estSE | MSE  | cv |
| <b>10% missing</b> |                  |       |       |      |    |                   |       |       |      |    |                   |       |       |      |    |
| Complete data      | 0.414            | 0.198 | 0.195 | 39.2 | 94 | 0.336             | 0.073 | 0.075 | 5.3  | 96 | 0.338             | 0.078 | 0.075 | 6.07 | 94 |
| Complete cases     | 0.421            | 0.245 | 0.242 | 60   | 95 | 0.340             | 0.092 | 0.093 | 8.55 | 94 | 0.342             | 0.098 | 0.093 | 9.77 | 94 |
| Match var: FCS     | 0.428            | 0.204 | 0.207 | 41.7 | 96 | 0.326             | 0.071 | 0.078 | 5.03 | 96 | 0.345             | 0.078 | 0.076 | 6.26 | 94 |
| Normal             | 0.408            | 0.195 | 0.206 | 38.1 | 96 | 0.327             | 0.071 | 0.078 | 5.07 | 97 | 0.345             | 0.078 | 0.076 | 6.29 | 95 |
| Latent norm        | 0.420            | 0.205 | 0.207 | 42   | 96 | 0.337             | 0.073 | 0.079 | 5.41 | 97 | 0.340             | 0.079 | 0.076 | 6.22 | 95 |
| Match set: FCS     | 0.428            | 0.206 | 0.208 | 42.7 | 96 | 0.325             | 0.072 | 0.078 | 5.21 | 96 | 0.345             | 0.078 | 0.076 | 6.28 | 95 |
| Normal             | 0.417            | 0.202 | 0.211 | 41   | 96 | 0.330             | 0.072 | 0.079 | 5.18 | 97 | 0.343             | 0.079 | 0.076 | 6.3  | 95 |
| Latent norm        | 0.413            | 0.211 | 0.210 | 44.5 | 95 | 0.337             | 0.075 | 0.080 | 5.65 | 97 | 0.338             | 0.079 | 0.076 | 6.32 | 95 |
| <b>25% missing</b> |                  |       |       |      |    |                   |       |       |      |    |                   |       |       |      |    |
| Complete data      | 0.414            | 0.198 | 0.195 | 39.2 | 94 | 0.336             | 0.073 | 0.075 | 5.3  | 96 | 0.338             | 0.078 | 0.075 | 6.07 | 94 |
| Complete cases     | 0.423            | 0.353 | 0.356 | 124  | 96 | 0.350             | 0.136 | 0.136 | 18.8 | 96 | 0.350             | 0.141 | 0.137 | 20.3 | 95 |
| Match var: FCS     | 0.443            | 0.222 | 0.228 | 49.9 | 96 | 0.314             | 0.072 | 0.084 | 5.6  | 96 | 0.353             | 0.080 | 0.078 | 6.77 | 95 |
| Normal             | 0.394            | 0.202 | 0.223 | 41.3 | 97 | 0.316             | 0.073 | 0.084 | 5.59 | 97 | 0.356             | 0.080 | 0.078 | 6.86 | 95 |
| Latent norm        | 0.419            | 0.231 | 0.229 | 53.4 | 95 | 0.338             | 0.079 | 0.086 | 6.25 | 97 | 0.343             | 0.080 | 0.078 | 6.57 | 95 |
| Match set: FCS     | 0.441            | 0.231 | 0.232 | 53.9 | 96 | 0.312             | 0.075 | 0.084 | 6.12 | 96 | 0.355             | 0.080 | 0.078 | 6.87 | 95 |
| Normal             | 0.414            | 0.221 | 0.238 | 48.6 | 97 | 0.325             | 0.077 | 0.087 | 6.08 | 97 | 0.348             | 0.081 | 0.079 | 6.83 | 95 |
| Latent norm        | 0.410            | 0.252 | 0.241 | 63.3 | 95 | 0.338             | 0.084 | 0.090 | 7    | 97 | 0.338             | 0.083 | 0.079 | 6.88 | 95 |

Web Table 14: Results from 1000 simulated datasets of  $N = 500$  cases and  $M = 1$  control per case with MCAR missingness mechanism in Sensitivity Analysis 2 (where  $X^{\text{conA}}$  and  $X^{\text{conB}}$  are log normally distributed). ‘LOR’ is mean estimated log odds ratio, ‘SE’ is empirical standard error, ‘estSE’ is mean estimated standard error, ‘MSE’ is mean squared error  $\times 1000$ , and ‘cv’ is coverage of 95% confidence interval. True log odds ratios are 0.417, 0.333 and 0.333 for  $X^{\text{cat}}$ ,  $X^{\text{conA}}$  and  $X^{\text{conB}}$ , respectively.



|                    | $X^{\text{cat}}$ |       |       |      |    | $X^{\text{conA}}$ |       |       |      |    | $X^{\text{conB}}$ |       |       |      |    |
|--------------------|------------------|-------|-------|------|----|-------------------|-------|-------|------|----|-------------------|-------|-------|------|----|
|                    | LOR              | eSE   | estSE | MSE  | cv | LOR               | eSE   | estSE | MSE  | cv | LOR               | eSE   | estSE | MSE  | cv |
| <b>10% missing</b> |                  |       |       |      |    |                   |       |       |      |    |                   |       |       |      |    |
| Complete data      | 0.414            | 0.198 | 0.195 | 39.2 | 94 | 0.336             | 0.073 | 0.075 | 5.3  | 96 | 0.338             | 0.078 | 0.075 | 6.07 | 94 |
| Complete cases     | 0.422            | 0.245 | 0.246 | 59.9 | 95 | 0.341             | 0.092 | 0.092 | 8.55 | 96 | 0.328             | 0.103 | 0.098 | 10.6 | 94 |
| Match var: FCS     | 0.427            | 0.204 | 0.208 | 41.8 | 96 | 0.330             | 0.073 | 0.079 | 5.41 | 96 | 0.336             | 0.080 | 0.077 | 6.45 | 94 |
| Normal             | 0.404            | 0.195 | 0.208 | 38.3 | 97 | 0.331             | 0.073 | 0.079 | 5.36 | 96 | 0.338             | 0.080 | 0.077 | 6.45 | 95 |
| Latent norm        | 0.419            | 0.204 | 0.208 | 41.5 | 96 | 0.339             | 0.076 | 0.079 | 5.81 | 96 | 0.332             | 0.081 | 0.077 | 6.49 | 94 |
| Match set: FCS     | 0.409            | 0.207 | 0.209 | 42.7 | 96 | 0.323             | 0.074 | 0.079 | 5.65 | 96 | 0.341             | 0.081 | 0.078 | 6.67 | 94 |
| Normal             | 0.417            | 0.203 | 0.213 | 41.1 | 96 | 0.332             | 0.075 | 0.080 | 5.6  | 97 | 0.335             | 0.081 | 0.078 | 6.59 | 94 |
| Latent norm        | 0.413            | 0.209 | 0.211 | 43.9 | 95 | 0.337             | 0.077 | 0.080 | 5.92 | 96 | 0.331             | 0.082 | 0.078 | 6.7  | 94 |
| <b>25% missing</b> |                  |       |       |      |    |                   |       |       |      |    |                   |       |       |      |    |
| Complete data      | 0.414            | 0.198 | 0.195 | 39.2 | 94 | 0.336             | 0.073 | 0.075 | 5.3  | 96 | 0.338             | 0.078 | 0.075 | 6.07 | 94 |
| Complete cases     | 0.427            | 0.366 | 0.366 | 134  | 96 | 0.351             | 0.132 | 0.133 | 17.7 | 95 | 0.316             | 0.149 | 0.150 | 22.5 | 94 |
| Match var: FCS     | 0.438            | 0.227 | 0.232 | 52   | 95 | 0.322             | 0.076 | 0.086 | 5.89 | 97 | 0.335             | 0.084 | 0.081 | 7.06 | 95 |
| Normal             | 0.384            | 0.206 | 0.227 | 43.6 | 97 | 0.324             | 0.076 | 0.086 | 5.81 | 98 | 0.339             | 0.084 | 0.081 | 7.03 | 95 |
| Latent norm        | 0.421            | 0.234 | 0.233 | 54.8 | 95 | 0.341             | 0.082 | 0.087 | 6.71 | 97 | 0.326             | 0.085 | 0.081 | 7.3  | 94 |
| Match set: FCS     | 0.398            | 0.238 | 0.236 | 56.8 | 95 | 0.307             | 0.078 | 0.086 | 6.83 | 95 | 0.344             | 0.087 | 0.082 | 7.63 | 95 |
| Normal             | 0.415            | 0.226 | 0.243 | 51.1 | 97 | 0.327             | 0.080 | 0.089 | 6.45 | 97 | 0.329             | 0.086 | 0.082 | 7.46 | 95 |
| Latent norm        | 0.415            | 0.253 | 0.244 | 63.8 | 94 | 0.335             | 0.085 | 0.090 | 7.2  | 97 | 0.320             | 0.088 | 0.083 | 7.99 | 93 |

Web Table 15: Results from 1000 simulated datasets of  $N = 500$  cases and  $M = 1$  control per case with MAR-A missingness mechanism in Sensitivity Analysis 2 (where  $X^{\text{conA}}$  and  $X^{\text{conB}}$  are log normally distributed). ‘LOR’ is mean estimated log odds ratio, ‘SE’ is empirical standard error, ‘estSE’ is mean estimated standard error, ‘MSE’ is mean squared error  $\times 1000$ , and ‘cv’ is coverage of 95% confidence interval. True log odds ratios are 0.417, 0.333 and 0.333 for  $X^{\text{cat}}$ ,  $X^{\text{conA}}$  and  $X^{\text{conB}}$ , respectively.

|                    | $X^{\text{cat}}$ |       |       |      |    | $X^{\text{conA}}$ |       |       |      |    | $X^{\text{conB}}$ |       |       |      |    |
|--------------------|------------------|-------|-------|------|----|-------------------|-------|-------|------|----|-------------------|-------|-------|------|----|
|                    | LOR              | eSE   | estSE | MSE  | cv | LOR               | eSE   | estSE | MSE  | cv | LOR               | eSE   | estSE | MSE  | cv |
| <b>10% missing</b> |                  |       |       |      |    |                   |       |       |      |    |                   |       |       |      |    |
| Complete data      | 0.414            | 0.198 | 0.195 | 39.2 | 94 | 0.336             | 0.073 | 0.075 | 5.3  | 96 | 0.338             | 0.078 | 0.075 | 6.07 | 94 |
| Complete cases     | 0.431            | 0.238 | 0.237 | 56.8 | 95 | 0.350             | 0.091 | 0.090 | 8.57 | 95 | 0.216             | 0.106 | 0.098 | 25   | 73 |
| Match var: FCS     | 0.422            | 0.202 | 0.206 | 40.9 | 96 | 0.344             | 0.077 | 0.079 | 5.99 | 96 | 0.321             | 0.083 | 0.079 | 7.09 | 93 |
| Normal             | 0.393            | 0.196 | 0.205 | 38.9 | 96 | 0.345             | 0.076 | 0.079 | 5.97 | 96 | 0.324             | 0.083 | 0.079 | 7.01 | 94 |
| Latent norm        | 0.416            | 0.202 | 0.206 | 40.8 | 96 | 0.351             | 0.079 | 0.080 | 6.48 | 95 | 0.318             | 0.084 | 0.079 | 7.22 | 93 |
| Match set: FCS     | 0.414            | 0.205 | 0.207 | 41.9 | 96 | 0.333             | 0.076 | 0.079 | 5.7  | 96 | 0.325             | 0.085 | 0.080 | 7.36 | 93 |
| Normal             | 0.410            | 0.202 | 0.210 | 41   | 97 | 0.343             | 0.078 | 0.080 | 6.1  | 95 | 0.320             | 0.085 | 0.080 | 7.34 | 93 |
| Latent norm        | 0.410            | 0.206 | 0.209 | 42.6 | 96 | 0.347             | 0.079 | 0.080 | 6.46 | 95 | 0.315             | 0.085 | 0.080 | 7.59 | 92 |
| <b>25% missing</b> |                  |       |       |      |    |                   |       |       |      |    |                   |       |       |      |    |
| Complete data      | 0.414            | 0.198 | 0.195 | 39.2 | 94 | 0.336             | 0.073 | 0.075 | 5.3  | 96 | 0.338             | 0.078 | 0.075 | 6.07 | 94 |
| Complete cases     | 0.437            | 0.341 | 0.347 | 117  | 96 | 0.355             | 0.125 | 0.126 | 16.1 | 96 | 0.105             | 0.152 | 0.148 | 75.4 | 64 |
| Match var: FCS     | 0.426            | 0.226 | 0.231 | 51   | 96 | 0.346             | 0.081 | 0.088 | 6.79 | 97 | 0.310             | 0.088 | 0.084 | 8.27 | 93 |
| Normal             | 0.353            | 0.206 | 0.225 | 46.4 | 96 | 0.349             | 0.081 | 0.088 | 6.88 | 97 | 0.317             | 0.087 | 0.083 | 7.9  | 93 |
| Latent norm        | 0.412            | 0.228 | 0.230 | 51.9 | 95 | 0.360             | 0.086 | 0.089 | 8.04 | 96 | 0.303             | 0.089 | 0.084 | 8.76 | 92 |
| Match set: FCS     | 0.409            | 0.234 | 0.236 | 55   | 95 | 0.324             | 0.080 | 0.088 | 6.56 | 96 | 0.317             | 0.094 | 0.086 | 9.15 | 93 |
| Normal             | 0.398            | 0.225 | 0.241 | 50.9 | 96 | 0.346             | 0.085 | 0.091 | 7.43 | 97 | 0.306             | 0.091 | 0.086 | 9    | 92 |
| Latent norm        | 0.410            | 0.241 | 0.239 | 58   | 95 | 0.349             | 0.086 | 0.090 | 7.71 | 96 | 0.296             | 0.092 | 0.086 | 9.9  | 91 |

Web Table 16: Results from 1000 simulated datasets of  $N = 500$  cases and  $M = 1$  control per case with MAR-B missingness mechanism in Sensitivity Analysis 2 (where  $X^{\text{conA}}$  and  $X^{\text{conB}}$  are log normally distributed). ‘LOR’ is mean estimated log odds ratio, ‘SE’ is empirical standard error, ‘estSE’ is mean estimated standard error, ‘MSE’ is mean squared error  $\times 1000$ , and ‘cv’ is coverage of 95% confidence interval. True log odds ratios are 0.417, 0.333 and 0.333 for  $X^{\text{cat}}$ ,  $X^{\text{conA}}$  and  $X^{\text{conB}}$ , respectively.

| Method                      | $X^{\text{cat}}$ |       | $X^{\text{conA}}$ |       | $X^{\text{conB}}$ |       |
|-----------------------------|------------------|-------|-------------------|-------|-------------------|-------|
|                             | Est              | SE    | Est               | SE    | Est               | SE    |
| Complete cases              | 0.443            | 0.211 | 0.235             | 0.089 | 0.269             | 0.083 |
| MI using matching variables |                  |       |                   |       |                   |       |
| FCS                         | 0.306            | 0.159 | 0.305             | 0.069 | 0.314             | 0.059 |
| Normal                      | 0.298            | 0.151 | 0.318             | 0.067 | 0.310             | 0.059 |
| Latent norm                 | 0.324            | 0.158 | 0.300             | 0.072 | 0.316             | 0.060 |
| MI using matched set        |                  |       |                   |       |                   |       |
| FCS                         | 0.289            | 0.155 | 0.310             | 0.074 | 0.313             | 0.061 |
| Normal                      | 0.290            | 0.157 | 0.312             | 0.072 | 0.312             | 0.060 |
| Latent norm                 | 0.321            | 0.165 | 0.299             | 0.076 | 0.307             | 0.062 |

Web Table 17: Results from the specimen simulated dataset of Appendix H. Dataset has  $N = 500$  cases and  $M = 4$  controls per case with 25% missing values in  $X^{\text{cat}}$  and  $X^{\text{conA}}$ , generated independently in each variable and completely at random. ‘Est’ is the estimated log odds ratio and ‘SE’ is its estimated standard error.
